1            **Lipoproteome screening of the Lyme disease agent identifies novel**  
2            **inhibitors of antibody-mediated complement killing**

3            Michael J. Pereira<sup>a</sup>, Beau Wager<sup>a</sup>, Ryan J. Garrigues<sup>b</sup>, Eva Gerlach<sup>c</sup>, Joshua D. Quinn<sup>a</sup>, Alex  
4            Dowdell<sup>d</sup>, Marcia S. Osburne<sup>a</sup>, Wolfram R. Zückert<sup>d</sup>, Peter Kraiczy<sup>c</sup>, Brandon L. Garcia<sup>b</sup>, John  
5            M. Leong<sup>a</sup>

6            <sup>a</sup>Department of Molecular Biology and Microbiology, Tufts School of Medicine, Tufts  
7            University, Boston, Massachusetts, USA

8            <sup>b</sup>Department of Microbiology and Immunology, Brody School of Medicine, East Carolina  
9            University, Greenville, North Carolina, USA

10           <sup>c</sup>Institute of Medical Microbiology and Infection Control, University Hospital of Frankfurt,  
11           Goethe University Frankfurt, D-60596 Frankfurt, Germany. Electronic address:  
12           Kraiczy@em.uni-frankfurt.de.

13           <sup>d</sup>Department of Microbiology, Molecular Genetics, and Immunology, University of Kansas  
14           Medical Center, Kansas City, KS, USA

15           MP and BW contributed equally to this work

16           Corresponding authors: BLG, JML

17           **Classification**

18           BIOLOGICAL SCIENCES: Microbiology

19           **Keywords**

20           **Spirochete, lipoprotein, *Borrelia burgdorferi*, tick-borne disease, serum resistance, immune**  
21           **evasion, complement C1**

22           **Author Contributions:**

- 23           • Designed research: MJP, BW, PK, BLG, JML  
24           • Performed research: MJP, BW, RJG, PK, EG  
25           • Contributed new reagents or analytic tools; AD, WRZ  
26           • Analyzed data: MJP, BW, MSO, RJG, PK, BLG, JML  
27           • Wrote the paper: MJP, MSO, JDQ, BW, RJG, BLG, JML

28           **This PDF file includes:**

29           Main Text

30           Figures 1 to 5

31           Tables 1 to 2

32

33

34 **Abstract**

35

36 Spirochetal pathogens such as the causative agent of Lyme disease, *Borrelia burgdorferi*

37 *sensu lato*, encode an abundance of lipoproteins; however, due in part to their evolutionary

38 distance from more well-studied bacteria such as Proteobacteria and Firmicutes, very few

39 spirochetal lipoproteins have assigned functions. Indeed, *B. burgdorferi* devotes almost 8% of its

40 genome to lipoprotein genes and interacts with its environment primarily through the production

41 of at least eighty surface-exposed lipoproteins throughout its tick vector-vertebrate host lifecycle

42 (57). Several *B. burgdorferi* lipoproteins have been shown to serve diverse roles, such as cellular

43 adherence or immune evasion, but the functions for most *B. burgdorferi* surface lipoproteins

44 remain unknown. In this study, we developed a *B. burgdorferi* lipoproteome screening platform

45 utilizing intact spirochetes that enables the identification of previously unrecognized host

46 interactions. As spirochetal survival in the bloodstream is essential for dissemination, we

47 targeted our screen to C1, the first component of the classical (antibody-mediated) complement

48 pathway. We identified two high-affinity C1 interactions by the paralogous lipoproteins, ErpB

49 and ErpQ. Using biochemical, microbiological, and biophysical approaches, we demonstrated

50 that ErpB and ErpQ inhibit the activated forms of the C1 proteases, C1r and C1s, and represent a

51 new mechanistic class of C1 inhibitors that protect the spirochete from antibody-mediated

52 complement killing by allosteric regulation. In addition to identifying a novel mode of

53 complement inhibition, our study establishes a lipoproteome screening methodology as a

54 discovery platform for identifying direct host-pathogen interactions that are central to the

55 pathogenesis of spirochetes, such as the Lyme disease agent.

56

57

58 **Significance Statement**

59 Spirochetal pathogens encode an abundance of lipoproteins that can provide a critical  
60 interface with the host environment. For example, *Borrelia burgdorferi*, the model species for  
61 spirochetal biology, must survive an enzootic life cycle defined by fluctuations between vector  
62 (tick) and vertebrate host. While *B. burgdorferi* expresses over eighty surface lipoproteins—  
63 many of which likely contribute to host survival—the *B. burgdorferi* lipoproteome is poorly  
64 characterized. Here, we generated a platform to rapidly identify targets of *B. burgdorferi* surface  
65 lipoproteins and identified two orthologs that allosterically inhibit complement C1  
66 subcomponents, conferring resistance to classical complement killing. This work expands our  
67 understanding of complement evasion mechanisms and points towards a discovery approach for  
68 identifying host-pathogen interactions that are central to spirochete pathogenesis.

69

70

## 71 **Introduction**

72 The spirochete *Borrelia burgdorferi* sensu lato is the etiological agent of a diverse set of  
73 symptoms collectively referred to as Lyme disease, which is estimated to infect over 476,000  
74 people annually in the U.S (1). *B. burgdorferi* is transmitted to humans and other reservoir  
75 hosts—primarily small mammals and birds—via the bite of a nymphal or adult-stage infected  
76 hard tick (*Ixodes scapularis*). Upon tick feeding, bacteria are exposed to host blood in the tick  
77 midgut and then migrate to the salivary gland to be injected into the host dermis, where they  
78 establish a local spreading skin infection reflected in a characteristic expanding rash, erythema  
79 migrans (2, 3). The spirochetes then disseminate via the circulatory and/or lymphatic systems to  
80 colonize other sites, such as joints, heart, nervous tissue, and distant skin (4). Spirochetes can  
81 then be acquired by other feeding ticks, including larval stage ticks (5). As transovarial spread of  
82 *B. burgdorferi* does not occur in ticks, this feeding step is critical for intergenerational  
83 spirochetal transmission and retention of the bacterium in the tick population.

84 The ability of the spirochete to spread within the vertebrate host is reflected in its ability to  
85 cause multisystemic human disease, including arthritis, carditis, neuroborreliosis, and the  
86 formation of multiple erythema migrans lesions. The interaction of the Lyme disease spirochete  
87 with the host extracellular environment promotes its dissemination and persistence and is  
88 mediated, in part, by its surface lipoproteome. Spirochetal pathogens encode an abundance of  
89 lipoproteins, some of which are located on the bacterial surface (8, 69, 70), and in fact most of  
90 ~125 *B. burgdorferi* lipoproteins are surface localized (6, 58). Many of these lipoproteins  
91 recognize identical or related host targets and/or interact with more than one host ligand (7). For  
92 example, at least 11 *B. burgdorferi* lipoproteins recognize host glycosaminoglycans (8), and  
93 nearly a dozen more interact directly with components of the innate immune system known as

94 the complement cascade (9, 10). Understanding the interface between the complex *B.*  
95 *burgdorferi* surface lipoproteome and host macromolecules is fundamental to improving disease  
96 treatment and pursuing novel vaccine targets. However, due in part to their evolutionary distance  
97 from the better-studied bacteria such as Proteobacteria and Firmicutes, relatively few *B.*  
98 *burgdorferi* lipoproteins have assigned functions.

99 For both survival during exposure to the bloodmeal in the tick midgut and dissemination of  
100 the spirochete throughout the vertebrate host, protection against host defenses is essential. The  
101 complement system is the most immediate threat to survival that pathogens must contend with in  
102 the blood. This system is composed of a set of soluble and membrane-associated proteins that  
103 interact and activate a multistep proteolytic cascade upon detection of microbial surfaces,  
104 ultimately forming complexes that can damage microbial membrane integrity, recruit immune  
105 cells, and enhance phagocytosis (11–14). The three canonical pathways of complement system  
106 activation are each triggered by the recognition of molecular patterns on pathogenic surfaces.  
107 The lectin pathway (LP) proceeds by the recruitment of serine proteases (MASPs) to mannose-  
108 binding lectin (MBL) bound to the microbial surface by recognition of mannose or related  
109 sugars. The alternative pathway (AP) is triggered when complement factor C3 undergoes  
110 spontaneous self-cleavage in proximity of a microbial surface; it also serves as the central  
111 amplification loop of the complement cascade. The classical pathway (CP) typically initiates  
112 through the binding of host C1 to IgG or IgM complexes on the bacterial surface, although  
113 pathogen- or damage-associated molecular patterns can also trigger this pathway. All three  
114 pathways result in the formation of enzymatic complexes that trigger the release of  
115 proinflammatory peptides, the opsonization of the microbe, and the formation of a membrane  
116 attack complex (MAC) that lyses the pathogen.

117 To promote survival during tick feeding and/or spread within the vertebrate host, *B.*  
118 *burgdorferi* encodes surface lipoproteins that inhibit key steps of complement activation (9, 10,  
119 71). *B. burgdorferi* OspC (Outer surface protein C), a lipoprotein essential to the spirochete life  
120 cycle, binds to C4b to inhibit *B. burgdorferi* bloodstream clearance (15). In addition, *B.*  
121 *burgdorferi* produces three distinct classes of Factor H binding proteins termed Complement  
122 Regulator Acquiring Surface Proteins (CRASPs), including CspA (CRASP-1), CspZ (CRASP-  
123 2), and ErpP/ErpC/ErpA (CRASP-3/CRASP-4/CRASP-5) (16–25). Each of these proteins binds  
124 Factor H, the major negative host regulator of the central amplification loop of the complement  
125 cascade and protects the bacterial surface from C3 deposition (59). The timing of expression  
126 varies among CRASPs, and CspA is specifically required for tick-to-host spirochete  
127 transmission, whereas CspZ mediates dissemination through the bloodstream and into distal  
128 tissues (26, 27).

129 Among known borrelial complement evasion proteins, *B. burgdorferi* BBK32 is unique in its  
130 ability to bind the complement C1 complex (28, 29). As the sole activator of the CP, C1 is  
131 comprised of the scaffold protein C1q and a heterotetramer of the serine proteases C1r and C1s  
132 (*i.e.*, C1qC1r<sub>2</sub>C1s<sub>2</sub>). C1q binding to the Fc region of an engaged antibody activates C1r to cleave  
133 C1s, which in turn cleaves complement components C2 and C4, leading to downstream C3 and  
134 C5 activation. BBK32 binds the C1 complex by recognizing C1r, blocking C1r proteolytic  
135 activity. When ectopically produced in a non-infectious, high-passage, otherwise serum-sensitive  
136 *B. burgdorferi* strain, BBK32 confers serum resistance (28). However, in an infectious strain  
137 background (*i.e.*, strain B31), a  $\Delta bbk32$  mutant remains resistant to CP-mediated complement  
138 killing (28), suggesting that additional borrelial factors protect the spirochete from complement  
139 activation through this pathway.

140 *B. burgdorferi* carries as many as 21 endogenous plasmids, many of which are not stably  
141 maintained during *in vitro* culture, thus complicating genetic approaches to the identification of  
142 novel virulence factors (30). Nevertheless, a transposon library of *B. burgdorferi* has previously  
143 proved useful for genome-wide screens to identify many virulence factors (31). Unfortunately,  
144 functional redundancy of lipoproteins may limit its utility in exploring the genome for host  
145 interactions. Alternatively, gain-of-function studies have allowed researchers to detect the  
146 acquisition of new virulence-associated functions, such as complement resistance or cell  
147 attachment (28, 32, 72, 73). This is accomplished through ectopic lipoprotein production in a  
148 high-passage strain that, due to stochastic plasmid loss, lacks many virulence-associated  
149 functions and is non-infectious. To comprehensively identify *B. burgdorferi* lipoproteins located  
150 on the outer surface of the spirochete, Dowdell *et al.* ectopically produced epitope-tagged  
151 versions of all 127 putative lipoproteins encoded by *B. burgdorferi* strain B31 in the high  
152 passage strain B31-e2, finding that more than 80 are detected on the outer surface (6).

153 In this study, we used this library of B31-e2 clones to establish a surface lipoproteome  
154 screening methodology. Based on the serum resistance phenotype of a *bbk32*-deficient mutant  
155 described above and the observation that the complement evasion system of Lyme disease  
156 spirochetes has evolved to be functionally overlapping, we targeted our lipoproteome screen  
157 towards the human C1 complex. We found that two members of the Erp lipoprotein family, ErpB  
158 and ErpQ, bind C1 with high affinity and block its activity through a mechanism involving  
159 allosteric inhibition of the C1s protease subcomponent. Furthermore, we show that ErpB and  
160 ErpQ promote resistance to antibody-dependent complement killing. The discovery of a new role  
161 for ErpB and ErpQ in evading complement provides a validation of our lipoproteome screening

162 methodology, which may be leveraged again in future studies to better understand the host-

163 pathogen interface of the most prominent vector-borne pathogen in North America.

164



165 **Results**

166 **Screening the *B. burgdorferi* surface lipoproteome identifies high-affinity interactions**  
167 **between ErpB and ErpQ with human C1**

168 Utilizing a previously described lipoproteome library, we developed a whole-cell binding  
169 assay to screen 80 strains of *B. burgdorferi* B31-e2 that each ectopically overproduce a single  
170 distinct C-terminally His-tagged, surface-localized lipoprotein from the *B. burgdorferi*  
171 lipoproteome (6) for the ability to adhere to candidate ligands. As non-adherent controls, we  
172 included the parental strain B31-e2, as well as a strain that overproduces the periplasmic-  
173 localized lipoprotein BB0460. The 80 strains were previously shown to express surface-localized  
174 lipoproteins (6). To validate our approach, we first screened the library for strains that bind to  
175 human fibronectin. As expected, the two strains that bound fibronectin most strongly  
176 overexpressed the *B. burgdorferi* outer surface lipoproteins BBK32 and RevA, each of which  
177 have been shown to bind human fibronectin (34–38) (**Fig S1, Table S1**).

178 To identify surface lipoproteins that target the classical complement pathway (CP), we  
179 screened the library for binding to purified, immobilized, human C1 complex. In addition to  
180 binding fibronectin and dermatan sulfate, BBK32 binds C1 (28, 29), and, as expected,  
181 spirochetes overexpressing BBK32 bound specifically to C1 in our screen (**Fig 1A, blue**).  
182 Interestingly, strains overexpressing lipoproteins ErpB or ErpQ also bound strongly to C1,  
183 exhibiting a relative signal higher than that of the BBK32-expressing strain (**Fig 1A**).

184 ErpB and ErpQ are members of the *B. burgdorferi* OspEF-related protein family (Erps)  
185 (39–41). All *erp* genes are encoded on circular plasmid 32 DNA elements (cp32), and in *B.*  
186 *burgdorferi* strain B31, ten cp32 plasmids together encode 13 Erp proteins (39–41). Of these,  
187 five belong to the Elp subfamily of Erps, which includes ErpB and ErpQ, and is defined by

188 OspE/F-like leader peptides (Elps) (42). In addition to ErpB and ErpQ, the *B. burgdorferi* strain  
189 B31 genome includes Elp members ErpM, ErpO, and ErpX (**Table S2**). Despite being encoded  
190 on separate cp32 plasmids, *erpB* and *erpO* are identical at the amino acid sequence level, and for  
191 simplicity, ErpO will be referred to as ErpB hereafter. In strain B31, the Elp proteins (i.e., ErpB,  
192 ErpM, ErpQ, and ErpX) are 44-59% identical and 59-76% similar and exhibit their highest  
193 identity in the N-terminal and C-terminal protein regions (**Fig S2, Table S2**).

194 To confirm the results of our screen, and because little is known about the function of Elp  
195 proteins, we individually tested strains producing each Elp in the ELISA-based spirochete  
196 binding assay against the C1 complex, including bovine serum albumin (BSA) as a negative  
197 control (**Fig 1A, inset**). Spirochetes expressing BBK32 (a C1-binding protein) and BB0460 (a  
198 periplasmic-localized lipoprotein (6)), were used as positive and negative controls, respectively.  
199 Strains producing ErpB, ErpQ, or BBK32 all exhibited statistically significant binding to C1  
200 relative to BSA, whereas ErpM, ErpX, and BB0460 did not (**Fig 1A, inset**).

201 To further investigate the ability of ErpB and ErpQ to directly bind to human C1, we  
202 purified recombinant GST-tagged fusion proteins (GST-ErpB and GST-ErpQ). Consistent with  
203 data obtained from the spirochete binding assay (**Fig 1A**), GST-ErpB and GST-ErpQ bound with  
204 high-affinity to immobilized C1 in an ELISA-type binding assay, exhibiting apparent  
205 equilibrium dissociation constants ( $K_D$ ) of 3.4 nM and 3.8 nM, respectively (**Fig 1B, Table 1**).  
206 To gain insight into the interaction of ErpB and ErpQ with soluble C1, we used surface plasmon  
207 resonance (SPR) whereby GST-ErpB and GST-ErpQ were immobilized on SPR sensor chips.  
208 When C1 was used as an analyte, strong C1-binding was observed, with GST-ErpB and GST-  
209 ErpQ exhibiting steady-state calculated  $K_D$  values of 5.6 and 11 nM, respectively (**Fig 1C, Table**

210 1). Together, these data confirm that ErpB and ErpQ individually promote spirochete binding to  
211 human C1 via direct interaction with this molecule.

### 212 **ErpB and ErpQ selectively bind the activated forms of C1r and C1s.**

213 The C1 complex is composed of C1q and a heterotetramer of C1r and C1s (i.e. C1r<sub>2</sub>C1s<sub>2</sub>)  
214 (Fig S3A). C1q is a non-enzymatic component and functions in pattern recognition, while C1r  
215 and C1s are serine proteases that catalyze the initial proteolytic reactions of the CP. To clarify  
216 whether ErpB and ErpQ bind to C1 by interacting with individual subcomponents, we carried out  
217 an ELISA-type binding assay using purified immobilized C1q and activated forms of C1r and  
218 C1s (i.e. C1r enzyme and C1s enzyme). Relative to the negative control GST-BB0460, no  
219 significant interaction was detected for either GST-ErpB or GST-ErpQ with human C1q, (Fig  
220 S3B). In contrast, each protein bound with high affinity to C1r enzyme ( $K_D$  of GST-ErpB/C1r =  
221 41 nM; GST-ErpQ/C1r = 11 nM) as well as to C1s enzyme ( $K_D$  of GST-ErpB/C1s = 6.7 nM;  
222 GST-ErpQ/C1s = 4.7 nM) (Fig S3C, D, Table 1).

223 To further study the interaction of C1r and C1s with ErpB and ErpQ, we utilized Far-  
224 western blot analysis, detecting the His tag on the ectopically produced lipoprotein. We first  
225 assessed the apparent molecular weights of ErpB and ErpQ in bacterial lysates by conventional  
226 western blotting, Pronase treatment was used to assess the surface-localization of each protein, as  
227 previously described (6). As expected, ErpB and ErpQ were predominantly expressed on the  
228 spirochetal surface and were detected as bands migrating at 61 kDa and 55 kDa, respectively.  
229 Full-length ErpQ was produced at higher levels than ErpB, and the presence of a prominent  
230 lower molecular weight ErpB band—presumably a stable degradation product—suggested that  
231 ErpB, but not ErpQ was subjected to proteolytic cleavage (Fig S4A-C). The higher level of ErpQ  
232 production correlated with a somewhat shorter bacterial length when observed under darkfield

233 microscopy. We then probed these bacterial lysates using purified human C1 or the C1  
234 subcomponent proteases to test for potential protein-protein interactions. Lysates from  
235 spirochetes expressing BBK32 (a C1r-binding positive control) contained a species that bound  
236 strongly to C1 complex, C1r proenzyme, and C1r enzyme, but, as expected, to neither form of  
237 C1s (**Fig 2 A, B**). In all cases the C1/C1r-binding species correlated with epitope-tagged BBK32  
238 (**Fig S4A**). The negative control BB0460 lysates contained no species that bound detectably to  
239 any complement protein probe (**Fig 2 A, B**). Consistent with the data shown in **Figs 1 and S3**,  
240 single bands coincident with ErpB and ErpQ, as judged by an  $\alpha$ -6xHis blot (**Fig S4A**), bound to  
241 C1 complex, C1r enzyme, and C1s enzyme (**Fig 2 A, B**). Furthermore, this binding was reduced  
242 in the lysates of cells treated with pronase (**Fig 2 A, B**).

243         Interestingly, we found that C1r proenzyme failed to bind either ErpB or ErpQ spirochete  
244 lysates (**Fig 2A**). Similarly, C1s proenzyme showed lower relative binding to ErpB and ErpQ  
245 compared to the activated form of C1s (**Fig 2B**). To follow up on this intriguing finding, we  
246 measured the relative affinities of pro- and active forms of both C1r and C1s for recombinant  
247 GST-ErpB and GST-ErpQ by SPR. Indeed, while GST-ErpB and GST-ErpQ bound to C1r  
248 enzyme with  $K_D$  values of 100 nM and 97 nM, respectively, neither protein exhibited detectable  
249 binding for C1r proenzyme (**Fig 2C, S5**). Similarly, GST-ErpB and GST-ErpQ bound C1s  
250 enzyme with ~70-fold and ~38-fold higher affinity, respectively, than C1s proenzyme ( $K_D = 3.9$   
251 nM vs. 270 nM;  $K_D = 4.5$  nM vs. 170 nM) (**Fig 2D, S5, Table 1**).

## 252 **ErpQ inhibits C1s cleavage of C2 and C4**

253         Having established that ErpB and ErpQ were capable of direct interaction with human C1  
254 via specific recognition of the protease subcomponents, using ErpQ we explored a potential  
255 mechanism of action for C1 inhibition. To facilitate clarity in our gel-based cleavage assays and

256 to eliminate the GST-tag from the mechanistic analysis, we generated an ErpQ construct lacking  
257 this epitope. The “tagless” ErpQ behaved nearly identically in SPR C1s-binding assays and  
258 ELISA-based complement assays when compared to GST-ErpQ (**Fig S6**).

259 Previously we have shown that BBK32, which binds to C1r but not C1s, is capable of  
260 directly inhibiting purified C1r enzyme cleavage of C1s proenzyme (28). In contrast,  
261 recombinant ErpQ failed to block this reaction at protein concentrations several orders of  
262 magnitude greater than the C1r/ErpQ  $K_D$  (**Fig S7A**). ErpQ also failed to prevent the cleavage of  
263 the small peptidic C1r substrate Z-Gly-Arg-sBzl (60), whereas BBK32 did so readily (**Fig S7B**).  
264 Similarly, unlike futhan, the small molecule active site C1s inhibitor (60), 25  $\mu$ M ErpQ (i.e. , >  
265 5,500 fold over the measured  $K_D$ , **Table 1**) failed to inhibit the cleavage of the C1s peptidic  
266 substrate Z-L-Lys thiobenzyl by C1s, (**Fig 3A**). Thus, in the C1s/ErpQ complex, the active site  
267 of C1s remains accessible to a small peptide substrate.

268 We next tested whether ErpQ was capable of inhibiting C1s-mediated cleavage of native  
269 substrates. The cleavage of C2 or C4 by purified C1s was monitored by SDS-PAGE in the  
270 presence of increasing concentrations of ErpQ (**Fig 3B,C**). Whereas BBK32 failed to block C2  
271 cleavage by C1s (**Fig 3B, lane 3**) to generate the cleavage product C2b (“ $\leftarrow$  C2b”; **Fig 3B**),  
272 ErpQ blocked C1s-mediated C2 proteolysis and the concomitant formation of C2b in a dose-  
273 dependent fashion (**Fig. 3B, lanes 6-13**). Likewise, while BBK32 failed to prevent C4 cleavage  
274 by C1s (**Fig 3C, lane 3**) to generate the cleavage product C4 $\alpha$ ' (“ $\leftarrow$  C4 $\alpha$ ’”; **Fig 3C**), ErpQ did so  
275 in a dose-dependent manner (**Fig. 3C, lanes 6-13**). Densitometry analysis resulted in calculated  
276 ErpQ  $IC_{50}$ 's of 1.4  $\mu$ M and 11  $\mu$ M for C2 and C4, respectively. The observation that ErpQ  
277 inhibited the cleavage of large endogenous C1s substrates but not a small peptide C1s substrate

278 suggests that ErpQ inhibits C1s allosterically, leaving the active site of C1s accessible to small  
279 peptides.

### 280 **ErpB and ErpQ inhibit the classical pathway of complement**

281 Collectively, the data above identify a novel interaction between surface-expressed *B.*  
282 *burgdorferi* lipoproteins ErpB and ErpQ with human C1 and demonstrate that recombinant ErpQ  
283 blocks C1s activity. The CP is initiated by this C1 activity, so we tested the ability of ErpB and  
284 ErpQ to block successive steps in this pathway. Recombinant GST-ErpB or GST-ErpQ fusion  
285 proteins were added at increasing concentrations to normal human serum in microtiter wells  
286 coated with IgM to initiate CP activation. The surface deposition of C4b, C3b, and C5b-9,  
287 mimicking the fixation of successive components of the CP (59) was measured by ELISA. GST-  
288 BBK32 and GST-BB0460 served as positive and negative controls, respectively. Both GST-  
289 ErpB and GST-ErpQ inhibited the deposition of these three components in a dose-dependent  
290 manner, with half-maximal inhibitory concentrations (IC<sub>50</sub>'s) approximately ten-fold higher than  
291 the IC<sub>50</sub> of GST-BBK32 (**Fig 4A-C, Table 2**). GST-BB0460 showed no inhibitory activity. As  
292 C5b-9 is the membrane attack complex, capable of generating pores in membranes, we further  
293 tested each protein for protection of antibody-sensitized sheep red blood cells from CP-mediated  
294 lysis. As above, GST-ErpQ and GST-ErpB inhibited lysis in a dose-dependent manner, with an  
295 IC<sub>50</sub> of 1.5 and 1.6 μM, respectively, or ~20-fold higher than the IC<sub>50</sub> of GST-BBK32 (**Fig 4D,**  
296 **Table 2**).

### 297 **Ectopic production of ErpB and ErpQ protect spirochetes from complement-mediated** 298 **killing.**

299 The ability of recombinant GST-ErpB and GST-ErpQ to block complement deposition  
300 products and prevent lysis of red blood cells by the membrane attack complex suggested that

301 these proteins may protect spirochetes from antibody-dependent complement attack. We tested  
302 the ability of *B. burgdorferi* B31-e2 strains that ectopically produce (His-tagged) ErpB or ErpQ  
303 (Fig 1A) to resist CP killing, with BBK32 and BB0460 as positive and negative controls,  
304 respectively. Based on a previously-described assay to initiate the CP (61), we incubated these  
305 strains with *B. burgdorferi*-specific polyclonal antibodies, then added normal human serum to  
306 provide complement components and lysozyme to facilitate disruption of spirochetal integrity  
307 (see Methods). After dilution into BSK-II media and 72-hour incubation to allow for growth of  
308 surviving bacteria, we enumerated living spirochetes. Treatment with isotype control antibody or  
309 heat-inactivated serum were utilized as negative controls, and survival indices were calculated  
310 after normalization to spirochetes surviving treatment with heat-inactivated serum.

311 As predicted, a *B. burgdorferi* B31-e2 high-passage strain that ectopically produced the  
312 periplasmic protein BB0460 was highly susceptible to antibody-dependent complement killing,  
313 with an index of less than 0.3% (**Fig 5E, purple**). Conversely, production of BBK32 conferred  
314 high-level protection, with an index of ~56%, or ~190-fold higher than the negative control  
315 BB0460 (**Fig 5E, blue**). Spirochetes producing ErpB or ErpQ displayed survival indices of 9-  
316 and 56-fold higher, respectively, than the those producing BB0460 (**Fig 5E, green and red**).  
317 Compared to *B. burgdorferi* B31-e2 producing BB0460, the strain producing ErpQ displayed a  
318 six-fold defect in survival index after incubation with isotype control antibody, suggesting that  
319 the overproduction of ErpQ may moderately enhance susceptibility of the spirochete to non-CP  
320 serum killing. Nevertheless, the dramatically enhanced resistance to CP-mediated killing  
321 conferred by ErpB and ErpQ indicates that the inhibition of C1s cleavage and inactivation of the  
322 CP observed in biochemical assays reflects an activity that protects bacterial viability.

323

## 324 **Discussion**

325           Lyme disease spirochetes are typical of other spirochetal pathogens in that they encode  
326 many lipoproteins (58). Although the proportion of lipoproteins located in the periplasm varies  
327 among spirochetes (6, 69, 74, 75), surface lipoproteins are critical to pathogenesis and provide an  
328 important means by which pathogenic spirochetes interact with the host environment and (76,  
329 77). Of the approximately 125 lipoproteins encoded by the *B. burgdorferi* genome, the majority  
330 localize to the outer membrane (6), although functions for relatively few of these proteins have  
331 been elucidated. Adding to the complexity of understanding lipoprotein function, several of the  
332 best characterized *B. burgdorferi* outer surface lipoproteins, such as OspC and BBK32, have  
333 been shown to provide multiple independent functions during murine borreliosis (43–47).  
334 Building on the generation of a comprehensive lipoprotein library (6), we developed a screening  
335 methodology to identify novel interactions between host macromolecules and the *B. burgdorferi*  
336 surface lipoproteome expressed in its native environment in the outer membrane of intact  
337 spirochetes. This methodology has the potential to uncover diverse host interactions that take  
338 place at the spirochete surface and may be valuable in the study of other pathogenic bacteria as  
339 well.

340           As an extracellular pathogen that encounters host blood during both the tick bloodmeal  
341 and throughout dissemination and colonization of their vertebrate hosts, Lyme disease  
342 spirochetes must prevent complement-mediated opsonization and lysis at multiple stages in the  
343 enzootic cycle. Moreover, the complement system employs three distinct pathways for activation  
344 that together form a complex host defense. Reflecting this, nearly a dozen different *B.*  
345 *burgdorferi* outer surface lipoproteins have been shown to directly interact with complement  
346 components, disrupting their activities (9, 10). At least three factors contribute to the multiplicity



347 of lipoproteins devoted to thwart complement defense. First, distinct borrelial complement  
348 evasion proteins block different complement activation pathways. For example, BBK32  
349 selectively targets C1r, the initiator protease of the classical pathway, while OspC binds to C4b,  
350 the downstream activation product of both the classical and lectin pathways (15, 28, 29). Second,  
351 individual borrelial lipoproteins may target the same host protein but function at different stages  
352 of the enzootic cycle. *B. burgdorferi* CspA and CspZ both bind to factor H and prevent activation  
353 of the alternative pathway, but CspA is expressed exclusively in the tick midgut and prevents the  
354 bacteriocidal effects of the bloodmeal, whereas CspZ is produced early in vertebrate infection  
355 and fosters the establishment of infection in that host (26, 27, 78). Finally, although some Lyme  
356 disease spirochete strains are restricted to only a single vertebrate, other strains have the capacity  
357 to infect multiple vertebrate hosts (62) that encode polymorphic complement components (63,  
358 64). Indeed, variation in CspA sequences have been shown to dictate binding to mammalian vs.  
359 avian factor H and the concomitant capacity to infect these two hosts (27, 66). Likewise, the  
360 production of multiple complement-inactivating proteins may permit the broad host specificity  
361 displayed by some *B. burgdorferi* strains. Thus, the collective activities of multiple complement  
362 evasion proteins of *B. burgdorferi* may provide the distinct temporal and spatial needs to thrive  
363 in enzootic cycles that involve multiple hosts. Due to the complexity of these interactions. *B.*  
364 *burgdorferi* serves as a useful model for understanding how a wide range of complement  
365 inactivation mechanisms together foster the retention of a pathogen in nature.

366 Consistent with the observation that partial functional redundancy is a hallmark of the *B.*  
367 *burgdorferi* complement evasion system, BBK32 was sufficient to protect spirochetes from  
368 complement-mediated killing, but *bbk32*-deficient mutants remained serum resistant (28). Thus,  
369 we focused our surface lipoproteome screen on the classical pathway component C1. We

370 identified two members of the paralogous Elp protein family, ErpB and ErpQ (from *B.*  
371 *burgdorferi* strain B31), as capable of forming high affinity interactions with the human C1  
372 complex (**Figs 1, 2, S3**); both proteins are antigenic during experimental murine and human  
373 infection, indicating that they are produced *in vivo* (83, 84, 85). The Erp family encompasses  
374 more than 17 genes in strain B31 (86) that share highly homologous leader peptides and DNA  
375 sequence at the 5' end of their operons (39, 42, 83). However, the amino acid sequences of their  
376 mature proteins group them into the OspE-related, OspF-related, and Elp subfamilies that are  
377 evolutionarily unrelated (42). Many OspE-related proteins have been shown to bind factor H (87,  
378 88, 89, 90, 91), and several OspF-related proteins bind to heparan sulfate (32). Our finding that  
379 two Elp members bind to complement C1 further supports the hypothesis of divergent functions  
380 among the three subfamilies (42).

381 Consistent with the mechanistic divergence of anti-complement lipoproteins, ErpB and  
382 ErpQ, like BBK32, prevent antibody-mediated complement activation but target the C1 complex  
383 via distinct means. BBK32 does not bind C1s, but recognizes both zymogen and activated forms  
384 of C1r, blocking its enzymatic activity. In contrast, ErpB and ErpQ bind to both C1r and C1s but  
385 selectively recognize activated forms of the proteases (**Figs 2, S5**). Further, we showed that ErpQ  
386 is incapable of blocking C1r activity (**Fig S7**) but prevents cleavage of both C2 and C4 by  
387 activated C1s enzyme (**Fig 3B**); it seems highly likely that ErpB possesses a similar activity.  
388 Finally, ErpQ did not prevent cleavage of small peptide substrates, and is unusual among  
389 microbial-derived serine protease inhibitors, such as ecotin or BBK32 (49), which typically  
390 target the active site (79, 80).

391 Previous work showed that expression of BBK32 by a high-passage, noninfectious *B.*  
392 *burgdorferi* strain enhanced serum resistance, and that simultaneous inactivation of the classical

393 and lectin pathways eliminated this enhancement, indicating that BBK32 blocked one or both  
394 pathways. To confirm that the C1-binding activities of BBK32, ErpB and ErpQ specifically  
395 blocked classical complement killing, we triggered this pathway by treating high-passage strains  
396 that ectopically produce these proteins with anti-*B. burgdorferi* antibody. Whereas BBK32, ErpB  
397 and ErpQ provided no survival advantage when spirochetes were treated with serum  
398 supplemented with isotype control antibody, all three lipoproteins promoted survival when  
399 incubated with specific antibody, indicating that the C1r- or C1s-inhibitory activities of BBK32  
400 or ErpB and ErpQ, respectively, protected spirochetes from classical complement killing.  
401 BBK32 provided the greatest degree of protection, enhancing the survival index 190-fold relative  
402 to BB0460, compared to 56-fold and 9-fold for ErpQ and ErpB, respectively, (**Fig 5**). Notably,  
403 BBK32 and ErpQ appeared to be expressed at much higher levels than ErpB (**Fig 2A**). In  
404 addition, BBK32 inhibited C4b and C3b in vitro deposition and complement-mediated RBC  
405 hemolysis at ~10-fold lower concentrations than ErpB or ErpQ (**Fig 4**).

406 The innate and adaptive immune system intersect at the level of the classical pathway of  
407 complement when antibody-antigen immune complexes are recognized by complement C1,  
408 triggering the complement cascade. Blocking complement C1 may be critical for *B. burgdorferi*  
409 persistence in immunocompetent hosts, which generate a specific antibody response during  
410 chronic infection. This activity might also be required to establish infection in a previously  
411 infected host, or, given that natural antibodies recognize the Lyme disease spirochete (50), in a  
412 naïve host.

413 ErpB and ErpQ display identical biochemical activities, and no evidence to-date has  
414 indicated divergent expression patterns between the two genes, raising the possibility that they  
415 are functionally redundant. In addition, other Elp family members such as ErpX and ErpM

416 (which is as closely related to ErpB and ErpQ as they are to each other; Table S3) did not bind  
417 human C1 (**Fig 1A**). Complement C1 is polymorphic among vertebrates, and whether these Elp's  
418 recognize C1 of other *B. burgdorferi* hosts, perhaps contributing to host specificity, remains to  
419 be tested (81). Historically, comprehensive analysis of *B. burgdorferi* gene families has been  
420 limited by the difficulty of genetic manipulation of infectious strains. However, recent adaptation  
421 of CRISPRi to this pathogen (82) may enable future comprehensive examinations of the role of  
422 Elp proteins during the enzootic lifecycle of *B. burgdorferi*.

423

## 424 **Materials and Methods**

### 425 *Expression plasmid cloning and protein purification*

426 All primers used in this study are listed in TableS4. To generate expression plasmids  
427 encoding N-terminal GST fusions of ErpB, ErpQ, BBK32, and BB0460, genomic DNA was first  
428 prepared from these *B. burgdorferi* B31-e2 expression strains using the DNeasy Blood and  
429 Tissue Kit (Qiagen). The open reading frame (lacking the putative lipoprotein signal sequence)  
430 of each gene was PCR amplified using Q5 Hot Start Master Mix (New England Biolabs). Each  
431 PCR fragment, except for the one encoding ErpB, was engineered into the MCS of the  
432 pGEX4T2 expression vector (GE Healthcare Life Sciences) using BamHI and XmaI restriction  
433 sites. For *erpB*, which contains an internal BamHI restriction site, EcoRI and XmaI were used.  
434 Inserts were ligated into vector pGEX4T2 and the ligations were transformed into *E. coli* DH5 $\alpha$   
435 as previously described (67). Transformants were confirmed by BamHI/EcoRI and XmaI  
436 restriction digest of the plasmids, followed by gel electrophoresis on a 1% agarose gel for one  
437 hour at 75 V. Clones containing the correct insert were Sanger sequenced using an ABI 3130XL  
438 automated sequencer (Applied Biosciences). Confirmed plasmids were subsequently transformed  
439 into *E. coli* BL21(DE3) as previously described (67).

440 To purify GST-tagged proteins, *E. coli* BL21(DE3) cells encoding the appropriate  
441 plasmid were grown in broth culture with aeration at 37°C to an OD<sub>600nm</sub> of 0.6, then induced  
442 with 1 mM IPTG (Sigma Aldrich) with aeration at room temperature overnight. The following  
443 day, cells were lysed using an M-110S Microfluidizer (Microfluidics) and proteins were purified  
444 using glutathione chromatography according to the manufacturer's instructions (GE Healthcare  
445 Life Sciences). To confirm the size and purity of purified recombinant protein, 25  $\mu$ l of column  
446 eluate was resolved by SDS-PAGE on a 4-20% gradient polyacrylamide gel run at 75 V for 1.5

447 hours. Gels were then stained for 30 minutes with Coomassie blue solution [0.25% (w/v)  
448 Coomassie brilliant blue R-250, 45% (v/v) methanol, 10% (v/v) glacial acetic acid], rinsed in  
449 deionized water, and destained for two hours with destain solution [40% (v/v) methanol, 10%  
450 (v/v) glacial acetic acid]. Stained gels were imaged using a Syngene G:Box XR5 imager.

451 Untagged ErpQ<sub>19-343</sub> was subcloned into pT7HMT by incorporating 5' BamHI and 3'  
452 STOP and NotI site using the pGEX4T2 construct containing ErpQ as template. Subsequent  
453 expression of BBK32-C and ErpQ<sub>19-343</sub> was completed as previously described (49). All proteins  
454 used in study were assessed for purity by SDS-PAGE prior to use in assays.

#### 455 *Bacterial strains, plasmids, and lipoprotein gain-of-function library*

456 *E. coli* strains DH5 $\alpha$  and BL21(DE3) were cultured as described above. An epitope-  
457 tagged *B. burgdorferi* lipoprotein expression (“gain-of-function”) library in the high-passage,  
458 non-infectious B31-e2 background strain (6) was grown in BSK-II medium supplemented with  
459 6% (v/v) heat-inactivated normal rabbit serum (Atlanta Biologicals) at 33°C, pH 7.6, with  
460 ambient levels of CO<sub>2</sub> (68). BSK-II was supplemented with 100  $\mu$ g/ml of kanamycin (Sigma  
461 Aldrich) as necessary. The gain-of-function library consists of 80 individual *B. burgdorferi* B31-  
462 e2 clones containing the low copy (approximately 10 copies per cell) pSC:LP vector, where LP  
463 represents a unique surface-exposed *B. burgdorferi* lipoprotein expressed in each of the 80  
464 clones (Table S1). Ectopic expression of each lipoprotein-encoding gene is driven by the *B.*  
465 *burgdorferi* *flaB* constitutive promoter. The library was arrayed in multiple 96-well, sterile, flat  
466 bottom plates at a concentration of  $1 \times 10^7$  spirochetes/well ( $1 \times 10^8$  per ml) and stored at -80°C in  
467 BSK-II with 20% (v/v) glycerol.

#### 468 *Quantitation of binding of gain-of-function library clones to immobilized substrates*

469 Binding of gain-of-function library clones to immobilized substrates was measured using  
470 a modification of a previously-described ELISA-based assay (51). One  $\mu\text{g}/\text{well}$  purified BSA  
471 (Sigma Aldrich), or human derived fibronectin (Corning) or C1 proteins (Complement  
472 Technologies) in coating buffer [0.1M sodium bicarbonate, pH 9.6] was used to coat wells of an  
473 uncoated 96-well ELISA plate (Nunc Maxisorp) at  $4^{\circ}\text{C}$  overnight. On the same day, a single 96-  
474 well plate containing the gain of function library was thawed at room temperature and  
475 centrifuged ( $1,250 \times g$ , 15 min, RT) to pellet the spirochetes. The supernatant was discarded, and  
476 the cells were resuspended in  $200 \mu\text{l}/\text{well}$  of BSK-II and allowed to recover under normal growth  
477 conditions. The following day,  $80 \mu\text{l}$  ( $\sim 4 \times 10^6$  cells) of culture from each well of the 96-well plate  
478 were transferred to a new plate and centrifuged ( $1,250 \times g$ , 15 min, RT). The supernatant was  
479 discarded, and the cells were resuspended in  $200 \mu\text{l}/\text{well}$  HBS-DB [25 mM HEPES, 105 mM  
480 sodium chloride, 1 mM manganese chloride, 1 mM magnesium chloride, 0.1% (w/v) dextrose,  
481 0.2% (w/v) BSA, pH 7.8)]. The previously coated 96-well plate was washed three times with  
482 PBS-T [10 mM disodium phosphate, 1.8 mM monopotassium phosphate, 137 mM sodium  
483 chloride, 2.7 mM potassium chloride, 0.05% (v/v) Tween-20, pH 7.4] and was blocked with  $200$   
484  $\mu\text{l}/\text{well}$  of Ultrablock (BioRad) for 1.5 hours.

485 After discarding the blocking buffer, the plate was washed, then inoculated with  $50$   
486  $\mu\text{l}/\text{well}$  ( $\sim 1 \times 10^6$  spirochetes) of the resuspended gain-of-function library. The inoculated plate  
487 was centrifuged ( $1,250 \times g$ , 15 min, RT) to force the spirochetes into contact with the proteins  
488 coated on the bottoms of the wells. The plates were then incubated for one hour at room  
489 temperature, followed by three washes to remove unbound spirochetes. Bound spirochetes were  
490 affixed to the surface of the well by adding 4% formaldehyde (v/v) for 20 minutes at room

491 temperature. After fixation, the formaldehyde was removed, and the plates were air dried on the  
492 bench top overnight.

493 The following day fixed spirochetes were permeabilized with 50  $\mu$ l/well of ice-cold  
494 methanol for 10 minutes at  $-20^{\circ}\text{C}$ . Methanol was then removed and the plates were air dried for  
495 several minutes. Wells were then blocked with 200  $\mu$ l/well of 5% (w/v) non-fat dry milk in PBS-  
496 T for one hour, followed by washing. To detect spirochete binding, wells were incubated with a  
497 1:800 dilution of a polyclonal rabbit  $\alpha$ -Bb antibody (Abcam, ab20118) for one hour at room  
498 temperature, then washed and probed with a 1:2,000 dilution of an  $\alpha$ -rabbit alkaline phosphatase  
499 conjugated antibody (Sigma Aldrich, cat # A3687) for one hour at room temperature. Wells were  
500 then washed and signal developed using the SigmaFast pNpp reagent (Sigma Aldrich). The assay  
501 readout (OD<sub>405nm</sub>) was taken every minute for 15 minutes using a BioTek Synergy HT plate  
502 reader and Gen5 software. Bacterial binding is expressed as the  $V_{\text{mean}}$  of  $\Delta\text{OD}_{405\text{nm}}$ , calculated  
503 by determining the slope of the [OD<sub>405nm</sub> vs. time] best fit line across the linear portion of the  
504 15-minute kinetic assay. All experiments were repeated at least twice.

#### 505 *Quantitative ELISA to assess B. burgdorferi lipoprotein binding to purified human C1*

506 To quantitate the ability of *B. burgdorferi* lipoproteins to bind purified components of the  
507 C1 complex, we adapted a previously described quantitative ELISA-based assay (52). One  
508  $\mu$ g/well of purified human C1, C1q, C1r, or C1s proteins (Complement Technologies), or BSA  
509 (Sigma-Aldrich) as a negative control, were coated onto wells of an uncoated 96-well ELISA  
510 plate (Nunc Maxisorp) overnight at  $4^{\circ}\text{C}$  in coating buffer, as described above. The next day,  
511 plates were washed three times with PBST [10 mM disodium phosphate, 1.8 mM  
512 monopotassium phosphate, 137 mM sodium chloride, 2.7 mM potassium chloride, 0.05% (v/v)  
513 Tween-20, pH 7.4] and blocked with 5% (w/v) nonfat dry milk in PBST. Plates were then



514 washed, and 100  $\mu$ l/well of four-fold dilutions of GST-tagged BBK32, ErpB, ErpQ, or BB0460  
515 proteins, resulting in a range of concentrations from 1  $\mu$ M to 240 pM, were added to the ELISA  
516 plate, which was then incubated for one hour at room temperature. Wells were washed and  
517 probed with 100  $\mu$ l/well of a goat  $\alpha$ -GST antibody (GE Healthcare Life Sciences, 27457701V)  
518 diluted 1:800 and incubated for one hour at room temperature. Wells were washed again and  
519 probed with 100  $\mu$ l/well of a  $\alpha$ -goat alkaline phosphatase conjugated antibody (Sigma Aldrich,  
520 A4187) diluted 1:2,000 and incubated for one hour at room temperature. Wells were washed a  
521 final time and the assay was developed using the SigmaFast pNpp reagent (Sigma Aldrich).  
522 OD405nm was read every minute for 15 minutes in a BioTek Synergy HT plate reader using  
523 Gen5 software. Substrate binding is expressed as the  $V_{\text{mean}}$  of  $\Delta$ OD405nm, calculated by  
524 determining the slope of the [OD405nm vs. time] best fit line across the linear portion of the 15-  
525 minute kinetic assay. All experiments were repeated two to four times. KD was quantified by a  
526 saturated binding parameter non-linear regression analysis performed using GraphPad Prism 6.0  
527 software.

### 528 *Surface plasmon resonance*

529 Binding of C1 and its sub-components to GST-ErpB and GST-ErpQ was performed at  
530 25°C using a Biacore T200 (GE Healthcare) as previously described (Garcia 2016), with the  
531 following modifications. GST-ErpB and GST-ErpQ were amine coupled to the CMD200  
532 (Xantec bioanalytics) at 10  $\mu$ g/ml in 10 mM sodium acetate pH 4.0. Final immobilization  
533 densities shown in resonance units (RU) were 555.1 (GST-ErpB) and 451.1 RU (GST-ErpQ),  
534 and proenzyme studies were performed on 232.2 (GST-ErpB) and 485.7 (GST-ErpQ). C1s single  
535 cycle experiments had immobilization densities of 1181.3 (GST-ErpQ) and 1158.9 (ErpQ<sub>19-343</sub>).  
536 HBS-T-Ca<sup>2+</sup> (20 mM HEPES (pH 7.3), 140 mM NaCl, 0.005% (v/v) Tween 20, 5 mM CaCl<sub>2</sub>)

537 was used as the running buffer and a flowrate of 30  $\mu\text{l min}^{-1}$  was used in all experiments. All  
538 analytes were buffer exchanged into running buffer prior to experimentation.

539 Multi cycle steady state analysis were performed as follows, C1 complex (Complement  
540 Technologies) was injected over flow cells in a two-fold concentration series: 0.59, 1.2, 2.3, 4.7,  
541 9.4, 18.8, 37.5, 75, and 150 nM for 120 sec, followed by 180 sec dissociation. The same  
542 approach was used for proenzyme C1r, C1r enzyme, proenzyme C1s, and C1s enzyme  
543 (Complement Technologies), using a two-fold concentration series of 0.39, 0.78, 1.6, 3.1, 6.3,  
544 13, 25, 50, 100, and 200 nM. Surfaces were then regenerated by injecting 2M NaCl for 60 sec 3  
545 times consecutively, bringing the response to baseline. Alternatively, single cycle analysis was  
546 performed with a five-fold concentration series 0, 0.8, 4, 20, 100 nM with association times  
547 between each injection of 120 sec a final dissociation time of 600 sec. Kinetic analyses were  
548 performed on each sensorgram series using the Biacore T200 Evaluation Software 3.1 (GE  
549 Healthcare) and a 1:1 (Langmuir) binding model.

#### 550 *Proteinase K treatment, conventional western and far western immunoblotting*

551 Surface proteolysis of expressed lipoproteins was performed as previously described  
552 (34). Briefly,  $1 \times 10^8$  spirochetes were washed three times in HBS-DB and resuspended in 100  $\mu\text{l}$   
553 of HBS-DB. Spirochetes were then treated with 40  $\mu\text{g/ml}$  (final concentration) of pronase  
554 (Sigma) for one hour at room temperature. Reactions were inactivated with 2 mM  
555 phenylmethanesulfonyl fluoride (PMSF) (Sigma Aldrich) and cells were lysed by boiling for ten  
556 minutes in Laemmli buffer (34). Bacterial lysates were resolved by SDS-PAGE on a 4-20%  
557 gradient polyacrylamide gel at 75 V for 1.5 hours. After electrophoresis, samples were  
558 transferred to a PVDF membrane and used for western immunoblotting.

559 Conventional western immunoblotting was performed by blocking the PVDF membrane  
560 with 5% (w/v) nonfat dry milk in PBS-T. Antibodies used include the CD-1 antibody (a generous  
561 gift from Jorge Benach, Stony Brook University) (1:1000 dilution) for the detection of *B.*  
562 *burgdorferi flaB*, and a combination of  $\alpha$ -6 $\times$ His antibody (Sigma Aldrich, H1029) and HisProbe-  
563 HRP (Thermo) for the detection of affinity-tagged lipoproteins. Following washing,  
564 immunoblots were probed with the appropriate secondary  $\alpha$ -mouse antibody conjugated to  
565 horseradish peroxidase (Promega, W402B) at a dilution of 1:5000. Immune complexes were  
566 detected using the SuperSignal West Pico Chemiluminescent Substrate (ThermoFisher  
567 Scientific), following the manufacturer's instructions, and imaged using a Syngene G:Box XR5  
568 imager.

569 Far western immunoblotting was performed as previously described (53). Briefly,  
570 membranes were blocked in 5% (w/v) nonfat dry milk in PBS-T, followed by incubation with 2  
571  $\mu$ g/ml of purified C1q, C1r, or C1s (Complement Technologies) in protein binding buffer [20  
572 mM Tris (pH 7.5), 0.1M sodium chloride, 1 mM EDTA, 1 mM DTT, 10% (v/v) glycerol, 0.1%  
573 (v/v) Tween-20, 5% (w/v) nonfat dry milk] overnight at 4°C. The next day, membranes were  
574 washed in PBS-T and were incubated with  $\alpha$ -C1q (Complement Technologies, A200),  $\alpha$ -C1r  
575 (R&D Systems, MAB1807), or  $\alpha$ -C1s (R&D Systems, MAB2060) antibodies, following the  
576 manufacturer's recommended dilutions for western blotting. Following washing, immunoblots  
577 were probed with the appropriate secondary  $\alpha$ -goat (C1q) (Sigma Aldrich, A5420) or  $\alpha$ -mouse  
578 (C1r/s) (Promega, W402B) antibodies conjugated to horseradish peroxidase, at a dilution of  
579 1:5000. Immune complexes were detected using the SuperSignal West Pico Chemiluminescent  
580 Substrate (ThermoFisher Scientific), according to the manufacturer's instructions, and imaged  
581 using a Syngene G:Box XR5 imager.

582 *Inhibition of erythrocyte hemolysis by recombinant B. burgdorferi lipoproteins*

583           Inhibition of CP-mediated erythrocyte hemolysis by recombinant *B. burgdorferi*  
584 lipoproteins was assayed using a modified version of the previously described classical pathway  
585 hemolytic assay (28, 54). Normal human serum (Complement Technologies) was diluted to 2.3%  
586 (v/v) in CP/LP reaction buffer. GST-tagged ErpB, ErpQ, BBK32, or BB0460 proteins were  
587 serially diluted two-fold, 125  $\mu$ l of each dilution was mixed with 125  $\mu$ l of the diluted serum, and  
588 the mixtures were incubated at room temperature for one hour. During incubation, 5 ml of pre-  
589 opsonized sheep erythrocytes (Complement Technologies) were centrifuged (400  $\times$  g, 3 minutes,  
590 4°C) and washed twice in CP/LP reaction buffer. After washing, erythrocytes were resuspended  
591 in 5 ml of CP/LP buffer and 40  $\mu$ l of the erythrocyte suspension were added to each of the  
592 incubated serum-protein mixtures. These reactions were incubated for one hour at room  
593 temperature, gently vortexing every 15 minutes to ensure that erythrocytes remained in  
594 suspension. Following incubation, samples were centrifuged (600  $\times$  g, 3 minutes, 4°C) and 200  
595  $\mu$ l of supernatant from each sample was collected and the OD405nm was measured in a BioTek  
596 Synergy HT plate reader using Gen5 software.

597 *Inhibition of C3d deposition by recombinant B. burgdorferi lipoproteins*

598           To determine the effect of recombinant *B. burgdorferi* lipoproteins on CP-mediated  
599 deposition of C3d, we adapted a previously described ELISA based assay (28, 55). 96-well  
600 ELISA plates (Nunc Maxisorp) were coated with 300 ng human IgM (CP initiator) (Athens  
601 Research & Technology) in 100  $\mu$ l/well of coating buffer (see above) overnight at 4°C. The  
602 following day, the plates were washed three times with PBS-T (see above) and were blocked  
603 with 200  $\mu$ l of 1% (w/v) BSA (Sigma Aldrich) in PBS-T for one hour at room temperature.  
604 Normal human serum (Complement Technologies) was diluted to 2% (v/v) in CP reaction buffer

605 [20 mM HEPES (pH 7.3), 140 mM sodium chloride, 150  $\mu$ M calcium chloride, 500  $\mu$ M  
606 magnesium chloride, 0.1% (w/v) gelatin]. GST-tagged ErpB, ErpQ, BBK32, or BB0460 proteins  
607 were serially diluted two-fold and each dilution was mixed 1:1 with the above serum dilutions.  
608 100  $\mu$ l of each mixture was added to the complement initiator-treated wells. Plates were  
609 incubated in the presence of 5% CO<sub>2</sub> for one hour at 37°C, followed by three washes with PBS-  
610 T. Following deposition, wells were blocked with 200  $\mu$ l/well of 5% (w/v) nonfat dry milk in  
611 PBS-T for one hour at room temperature, followed by three washes with PBS-T. Wells were then  
612 probed with 100  $\mu$ l/well of a mouse  $\alpha$ -C3d (Abcam, ab17453) primary antibody diluted 1:500  
613 and incubated for one hour at room temperature. Wells were washed again and probed with 100  
614  $\mu$ l/well of a  $\alpha$ -mouse alkaline phosphatase-conjugated secondary antibody (Sigma Aldrich,  
615 A4187) diluted 1:2,000 and incubated for one hour at room temperature. Wells were washed a  
616 final time and developed using the SigmaFast pNpp reagent (Sigma Aldrich). OD<sub>405nm</sub>  
617 readings were taken every minute for 15 minutes in a BioTek Synergy HT plate reader using  
618 Gen5 software. Substrate binding is expressed as the V<sub>mean</sub> of  $\Delta$ OD<sub>405nm</sub>, which is calculated by  
619 determining the slope of the [OD<sub>405nm</sub> vs. time] best fit line across the linear portion of the 15-  
620 minute kinetic assay. All experiments were repeated two to four times.

#### 621 *Inhibition of C4d deposition by recombinant B. burgdorferi lipoproteins*

622 To show direct inhibition of classical pathway activation, an ELISA approach was used  
623 (28, 55). 3  $\mu$ g-mL<sup>-1</sup> Human IgM (Innovative Research), a classical pathway activator, in 100 mM  
624 Na<sub>2</sub>CO<sub>3</sub>/NaHCO<sub>3</sub> coating buffer pH 9.6 was immobilized overnight at 37°C in high-binding  
625 polypropylene microplates (Grenier bio-one). All subsequent steps were then washed three  
626 times, 100  $\mu$ l volumes, with TBS-T (50mM Tris (pH 8.0), 150 mM NaCl, 0.05% (v/v) TritonX-  
627 100). Unbound regions of the plate were then blocked with PBS-T-BSA (137mM NaCl, 2.7 mM

628 KCl, 10mM Na<sub>2</sub>HPO<sub>4</sub>, 1.8 mM KH<sub>2</sub>PO<sub>4</sub>, 1% (w/v) bovine serum albumin, and 0.05% (v/v)  
629 Tween-20) for 1 h at 37°C. Classical pathway-mediated complement activation was then induced  
630 by adding 2% final pooled Normal Human Serum (Innovative Research) and a two-fold dilution  
631 series of GST-ErpB/GST-ErpQ/GST-BB0460 or untagged proteins BBK32-C/ErpQ<sub>19-343</sub>,  
632 respectively, in CP Buffer (20 mM HEPES (pH 7.3), 0.1% (w/v) gelatin type A, 140 mM NaCl,  
633 2 mM CaCl<sub>2</sub>, 0.5 mM MgCl<sub>2</sub>) with incubation at 37°C for 1 hr. A 1:300 dilution anti-C4 antibody  
634 (HYB 162-02) (Santa Cruz Biotechnology) in CP Buffer incubated at 37°C for 1 hour was used  
635 to detect complement activation. A 1:3000 dilution of goat anti-mouse HRP secondary antibody  
636 (Thermo Scientific) was then used at room temperature with light rocking for 1 hour. Activation  
637 of HRP conjugated antibody was detected by room temperature 1-step Ultra TMB ELISA  
638 (Thermo Scientific) for 10 min with rocking in the dark. The reaction was then stopped with the  
639 addition of 0.16 N sulfuric acid and the absorbance measured at 450 nM on an EnSight  
640 multimode plate reader (PerkinElmer). Data were in-column normalized using cells containing  
641 serum only or no serum with buffer addition were used as 100% and 0% signal, respectively. All  
642 experiments were performed in triplicate and IC<sub>50</sub> values were determined using a variable four-  
643 parameter nonlinear regression analysis using GraphPad Prism 8.1.2.

#### 644 *Inhibition of C1r and C1s enzyme activity by synthetic peptide cleavage*

645 C1r enzyme and C1s enzyme assays were performed in HBS-Ca<sup>2+</sup> (20 mM HEPES  
646 (pH7.3), 140 mM NaCl, 5 mM CaCl<sub>2</sub>). C1r enzyme assays were completed by monitoring the  
647 autolytic activation of C1r proenzyme by adding GST-ErpB or GST-ErpQ, at a concentration of  
648 25 μM, with 25 nM C1r proenzyme. Subsequent addition of 300 μM Z-Gly-Arg thiobenzyl (MP  
649 Biomedicals) and 100 μM 5,5'-dithiobis(2-nitrobenzoic acid) (DTNB) (TCI) just prior to  
650 measurement for a final 80 μl reaction volume (56). C1s enzyme assays were performed by

651 adding GST-ErpB or GST-ErpQ, at a concentration of 25  $\mu$ M, to 100  $\mu$ M Z-L-Lys thiobenzyl  
652 and 100  $\mu$ M DTNB. Just prior to measurement, 6.25 nM C1s enzyme was added for a final 80  $\mu$ L  
653 reaction volume. Absorbance measurements were performed at 412 nM on a Versamax  
654 multimode plate reader (Molecular Devices) with plate reads occurring every 30 sec at 28° C for  
655 3 hrs (C1r) and 37°C for 1 hr (C1s). Data were in-column normalized by including the C1r  
656 proenzyme or C1s enzyme with substrate as 100% signal, or just peptide and DTNB as 0%.

#### 657 *Gel-Based Inhibition of C1s-Mediated C2/C4 Cleavage Assay*

658 To demonstrate inhibition of C1s mediated cleavage of C2 or C4 a 10  $\mu$ L reaction in  
659 HBS-Ca<sup>2+</sup> (10 mM HEPES (pH 7.3), 140 mM NaCl, 5 mM CaCl<sub>2</sub>) was made by adding 6.25 nM  
660 C1s enzyme with twofold dilutions of ErpQ<sub>19-343</sub> from 25,000 nM to 390 nM with subsequent  
661 addition of 1.25 $\mu$ L of C4 (1 mg/mL) or C2 (0.5 mg/mL) (Complement Technologies). The  
662 reaction proceeded at 37° C for 1 hour and was stopped by the addition of 5  $\mu$ L Laemmli buffer  
663 followed by boiling for 5 min. 10% SDS-PAGE gels were utilized with Coomassie staining. Gel  
664 imaging was completed on a ChemiDoc™ XRS+ (Bio-Rad). Gels are representative of three  
665 independent experiments.

666 Gel-based C2/C4 inhibition assays were subjected to further quantitative analysis with  
667 Image Lab™ (Bio-Rad). Lanes and bands were manually selected and analyzed as follows. C4 $\alpha$ '  
668 fragments were in lane normalized to C4b band and the background adjusted ratios are shown.  
669 C2b bands were in lane corrected for total C2 (C2 + C2b + C2a). 100% cleavage was constrained  
670 to C1s + C2/C4 control. Proenzyme C1s bands were normalized to in lane C1s light chain. In the  
671 event of no detection of a band a band was placed at the appropriate analysis molecular weight.  
672 A normalized four-parameter nonparametric response was analyzed in GraphPad v8.4.

673 Gel-based C2/C4 inhibition assays were subjected to further quantitative analysis with  
674 Image Lab™ (Bio-Rad). Lanes and bands were manually selected and analyzed as follows.  
675 C4 $\alpha$ ' fragments were in lane normalized to C4b band and the background adjusted ratios are  
676 shown. C2b bands were in lane corrected for total C2 (C2 + C2b + C2a). 100% cleavage was  
677 constrained to C1s + C2/C4 control. Proenzyme C1s bands were normalized to in lane C1s light  
678 chain. In the event of no detection of a band a band was placed at the appropriate analysis  
679 molecular weight. A normalized four-parameter nonparametric response was analyzed in  
680 GraphPad v8.4.

#### 681 *Gel-Based Inhibition of C1r-Mediated Proenzyme C1s Cleavage Assay*

682 Enzymatic inhibition assays were performed as previously described, with the following  
683 modifications (28). A 10  $\mu$ L reaction in HBS-Ca<sup>2+</sup> (10 mM HEPES (pH 7.3), 140 mM NaCl, 5  
684 mM CaCl<sub>2</sub>) was prepared by adding 1000 nM C1r to with twofold dilutions of ErpQ<sub>19-343</sub> from  
685 25,000 nM to 390 nM and finally 1  $\mu$ g proenzyme C1s. The reaction was incubated at 37° C for  
686 1 hour and was stopped by the addition of 5  $\mu$ L Laemmli buffer followed by boiling for 5 min.  
687 SDS-PAGE analysis was completed as in C2/C4 cleavage assay. Gel is representative of three  
688 independent experiments.

#### 689 *Classical pathway-mediated serum-killing assay*

690  $1 \times 10^9$  B31-e2 spirochetes expressing ErpB, ErpQ, BBK32, or BB0460 were harvested in  
691 late log phase by centrifugation (4,000  $\times$  g, 15 min). Supernatant was discarded and cell pellets  
692 were washed three times in CP buffer [20 mM HEPES (pH 7.3), 140 mM NaCl, 150  $\mu$ M CaCl<sub>2</sub>,  
693 500  $\mu$ M MgCl<sub>2</sub>, 0.1% gelatin]. After resuspending the pellet in 1 ml of CP buffer, the cells were  
694 split into three tubes containing  $5 \times 10^7$  spirochetes each. 4  $\mu$ g of an  $\alpha$ -*B. burgdorferi* antibody



695 (Abcam, ab20950) was added to two tubes, while its isotype control (Abcam, ab171870) was  
696 added to the third. Cell suspensions were incubated at room temperature for 1 hour, rocking.

697       Following incubation, the cells were pelleted, washed three times in CP buffer, and  
698 resuspended in 625  $\mu$ l of CP buffer. From one of the  $\alpha$ -Bb antibody tubes, as well as from the  
699 isotype control tube,  $1 \times 10^7$  spirochetes (125  $\mu$ l of cell suspension) was dispensed into tubes  
700 containing 125  $\mu$ l of 40% normal human serum (in CP buffer), supplemented with 20  $\mu$ g/ml  
701 lysozyme (Sigma, L6876), in triplicate. 125  $\mu$ l of cell suspension from the other  $\alpha$ -Bb antibody  
702 tube was dispensed into tubes containing 125  $\mu$ l of 40% heat-inactivated human serum (in CP  
703 buffer), supplemented with 20  $\mu$ g/ml lysozyme, in triplicate. Tubes were all mixed thoroughly by  
704 hand and incubated at 37°C, standing, for 4 hours.

705       Following the second incubation, the entire 250  $\mu$ l of the serum-cell suspension mixture  
706 was transferred into a culture tube containing 2.25 ml of BSK-II, supplemented with the  
707 appropriate antibiotics. These cultures were allowed to grow out for 72 hours in normal growth  
708 conditions. After 72 hours of growth, the cultures were counted in duplicate by dark field  
709 microscopy. Samples were normalized to triplicate counts from the heat-inactivated human  
710 serum samples.

## 711 **Acknowledgments**

712 Research reported in this publication was supported by the National Institute of Allergy and  
713 Infectious Diseases of the National Institutes of Health under award number R01AI146930  
714 (B.L.G), R01AI121401 (JML), K12GM133314 (JDQ). We thank Yi-Pin Lin and Jon Skare for  
715 invaluable discussion, and Brian Stevenson for providing anti-Erp antibodies.

## 716 **References**

- 717 1. Kugeler KJ, Schwartz AM, Delorey MJ, Mead PS, Hinckley AF. Estimating the  
718 Frequency of Lyme Disease Diagnoses, United States, 2010-2018. *Emerg Infect Dis*.

- 719 2021;27(2):616-619. doi:10.3201/eid2702.202731
- 720 2. Gilmore RD Jr, Piesman J. Inhibition of *Borrelia burgdorferi* migration from the midgut  
721 to the salivary glands following feeding by ticks on OspC-immunized mice. *Infect Immun.*  
722 2000;68(1):411-414. doi:10.1128/IAI.68.1.411-414.2000
- 723 3. Pal U, Yang X, Chen M, et al. OspC facilitates *Borrelia burgdorferi* invasion of *Ixodes*  
724 *scapularis* salivary glands. *J Clin Invest.* 2004;113(2):220-230. doi:10.1172/JCI19894
- 725 4. Coburn J, Garcia B, Hu LT, et al. Lyme Disease Pathogenesis. *Curr Issues Mol Biol.*  
726 2021;42:473-518. doi:10.21775/cimb.042.473
- 727 5. Radolf JD, Caimano MJ, Stevenson B, Hu LT. Of ticks, mice and men: understanding the  
728 dual-host lifestyle of Lyme disease spirochaetes. *Nat Rev Microbiol.* 2012;10(2):87-99.  
729 Published 2012 Jan 9. doi:10.1038/nrmicro2714
- 730 6. Dowdell AS, Murphy MD, Azodi C, et al. Comprehensive Spatial Analysis of the  
731 *Borrelia burgdorferi* Lipoproteome Reveals a Compartmentalization Bias toward the  
732 Bacterial Surface. *J Bacteriol.* 2017;199(6):e00658-16. Published 2017 Feb 28.  
733 doi:10.1128/JB.00658-16
- 734 7. Caine JA, Coburn J. Multifunctional and Redundant Roles of *Borrelia burgdorferi* Outer  
735 Surface Proteins in Tissue Adhesion, Colonization, and Complement Evasion. *Front*  
736 *Immunol.* 2016;7:442. Published 2016 Oct 21. doi:10.3389/fimmu.2016.00442
- 737 8. Lin YP, Li L, Zhang F, Linhardt RJ. *Borrelia burgdorferi* glycosaminoglycan-binding  
738 proteins: a potential target for new therapeutics against Lyme disease. *Microbiology*  
739 *(Reading)*. 2017;163(12):1759-1766. doi:10.1099/mic.0.000571
- 740 9. Skare JT, Garcia BL. Complement Evasion by Lyme Disease Spirochetes. *Trends*  
741 *Microbiol.* 2020;28(11):889-899. doi:10.1016/j.tim.2020.05.004
- 742 10. Lin YP, Frye AM, Nowak TA, Kraiczy P. New Insights Into CRASP-Mediated  
743 Complement Evasion in the Lyme Disease Enzootic Cycle. *Front Cell Infect Microbiol.*  
744 2020;10:1. Published 2020 Jan 30. doi:10.3389/fcimb.2020.00001
- 745 11. Merle NS, Church SE, Fremeaux-Bacchi V, Roumenina LT. Complement System Part I -  
746 Molecular Mechanisms of Activation and Regulation. *Front Immunol.* 2015;6:262.  
747 Published 2015 Jun 2. doi:10.3389/fimmu.2015.00262
- 748 12. Merle NS, Noe R, Halbwachs-Mecarelli L, Fremeaux-Bacchi V, Roumenina LT.  
749 Complement System Part II: Role in Immunity. *Front Immunol.* 2015;6:257. Published  
750 2015 May 26. doi:10.3389/fimmu.2015.00257
- 751 13. Walport MJ. Complement. First of two parts. *N Engl J Med.* 2001;344(14):1058-1066.  
752 doi:10.1056/NEJM200104053441406
- 753 14. Walport MJ. Complement. Second of two parts. *N Engl J Med.* 2001;344(15):1140-1144.  
754 doi:10.1056/NEJM200104123441506
- 755 15. Caine JA, Lin YP, Kessler JR, Sato H, Leong JM, Coburn J. *Borrelia burgdorferi* Outer  
756 Surface Protein C (OspC) Binds Complement Component C4b and Confers Bloodstream

- 757 Survival [published correction appears in *Cell Microbiol.* 2021 Jan;23(1):e13286]. *Cell*  
758 *Microbiol.* 2017;19(12):10.1111/cmi.12786. doi:10.1111/cmi.12786
- 759 16. Kraiczy P, Hellwage J, Skerka C, et al. Complement resistance of *Borrelia burgdorferi*  
760 correlates with the expression of BbCRASP-1, a novel linear plasmid-encoded surface  
761 protein that interacts with human factor H and FHL-1 and is unrelated to Erp proteins. *J*  
762 *Biol Chem.* 2004;279(4):2421-2429. doi:10.1074/jbc.M308343200
- 763 17. Hartmann K, Corvey C, Skerka C, et al. Functional characterization of BbCRASP-2, a  
764 distinct outer membrane protein of *Borrelia burgdorferi* that binds host complement  
765 regulators factor H and FHL-1. *Mol Microbiol.* 2006;61(5):1220-1236.  
766 doi:10.1111/j.1365-2958.2006.05318.x
- 767 18. Stevenson B, Tilly K, Rosa PA. A family of genes located on four separate 32-kilobase  
768 circular plasmids in *Borrelia burgdorferi* B31. *J Bacteriol.* 1996;178(12):3508-3516.  
769 doi:10.1128/jb.178.12.3508-3516.1996
- 770 19. Stevenson B, El-Hage N, Hines MA, Miller JC, Babb K. Differential binding of host  
771 complement inhibitor factor H by *Borrelia burgdorferi* Erp surface proteins: a possible  
772 mechanism underlying the expansive host range of Lyme disease spirochetes. *Infect*  
773 *Immun.* 2002;70(2):491-497. doi:10.1128/IAI.70.2.491-497.2002
- 774 20. McDowell JV, Wolfgang J, Tran E, Metts MS, Hamilton D, Marconi RT. Comprehensive  
775 analysis of the factor h binding capabilities of *Borrelia* species associated with lyme  
776 disease: delineation of two distinct classes of factor H binding proteins. *Infect Immun.*  
777 2003;71(6):3597-3602. doi:10.1128/IAI.71.6.3597-3602.2003
- 778 21. McDowell JV, Hovis KM, Zhang H, Tran E, Lankford J, Marconi RT. Evidence that the  
779 BBA68 protein (BbCRASP-1) of the Lyme disease spirochetes does not contribute to  
780 factor H-mediated immune evasion in humans and other animals. *Infect Immun.*  
781 2006;74(5):3030-3034.
- 782 22. Bykowski T, Woodman ME, Cooley AE, et al. *Borrelia burgdorferi* complement  
783 regulator-acquiring surface proteins (BbCRASPs): Expression patterns during the  
784 mammal-tick infection cycle. *Int J Med Microbiol.* 2008;298 Suppl 1(Suppl 1):249-256.  
785 doi:10.1016/j.ijmm.2007.10.002
- 786 23. Kenedy MR, Vuppala SR, Siegel C, Kraiczy P, Akins DR. CspA-mediated binding of  
787 human factor H inhibits complement deposition and confers serum resistance in *Borrelia*  
788 *burgdorferi*. *Infect Immun.* 2009;77(7):2773-2782. doi:10.1128/IAI.00318-09
- 789 24. Rogers EA, Abdunnur SV, McDowell JV, Marconi RT. Comparative analysis of the  
790 properties and ligand binding characteristics of CspZ, a factor H binding protein, derived  
791 from *Borrelia burgdorferi* isolates of human origin. *Infect Immun.* 2009;77(10):4396-  
792 4405. doi:10.1128/IAI.00393-09
- 793 25. Kenedy MR, Akins DR. The OspE-related proteins inhibit complement deposition and  
794 enhance serum resistance of *Borrelia burgdorferi*, the lyme disease spirochete. *Infect*  
795 *Immun.* 2011;79(4):1451-1457. doi:10.1128/IAI.01274-10
- 796 26. Marcinkiewicz AL, Dupuis AP 2nd, Zamba-Campero M, et al. Blood treatment of Lyme

- 797 borreliae demonstrates the mechanism of CspZ-mediated complement evasion to promote  
798 systemic infection in vertebrate hosts. *Cell Microbiol.* 2019;21(2):e12998.  
799 doi:10.1111/cmi.12998
- 800 27. Hart T, Nguyen NTT, Nowak NA, et al. Polymorphic factor H-binding activity of CspA  
801 protects Lyme borreliae from the host complement in feeding ticks to facilitate tick-to-  
802 host transmission. *PLoS Pathog.* 2018;14(5):e1007106. Published 2018 May 29.  
803 doi:10.1371/journal.ppat.1007106
- 804 28. Garcia BL, Zhi H, Wager B, Höök M, Skare JT. *Borrelia burgdorferi* BBK32 Inhibits the  
805 Classical Pathway by Blocking Activation of the C1 Complement Complex. *PLoS Pathog.*  
806 2016;12(1):e1005404. Published 2016 Jan 25. doi:10.1371/journal.ppat.1005404
- 807 29. Xie J, Zhi H, Garrigues RJ, Keightley A, Garcia BL, Skare JT. Structural determination of  
808 the complement inhibitory domain of *Borrelia burgdorferi* BBK32 provides insight into  
809 classical pathway complement evasion by Lyme disease spirochetes. *PLoS Pathog.*  
810 2019;15(3):e1007659. Published 2019 Mar 21. doi:10.1371/journal.ppat.1007659
- 811 30. Margos G, Hepner S, Mang C, et al. Lost in plasmids: next generation sequencing and the  
812 complex genome of the tick-borne pathogen *Borrelia burgdorferi*. *BMC Genomics.*  
813 2017;18(1):422. Published 2017 May 30. doi:10.1186/s12864-017-3804-5
- 814 31. Lin T, Gao L, Zhang C, et al. Analysis of an ordered, comprehensive STM mutant library  
815 in infectious *Borrelia burgdorferi*: insights into the genes required for mouse  
816 infectivity. *PLoS One.* 2012;7(10):e47532. doi:10.1371/journal.pone.0047532
- 817 32. Lin YP, Bhowmick R, Coburn J, Leong JM. Host cell heparan sulfate glycosaminoglycans  
818 are ligands for OspF-related proteins of the Lyme disease spirochete. *Cell Microbiol.*  
819 2015;17(10):1464-1476. doi:10.1111/cmi.12448
- 820 33. Yang X, Lin YP, Heselpoth RD, et al. Middle region of the *Borrelia burgdorferi* surface-  
821 located protein 1 (Lmp1) interacts with host chondroitin-6-sulfate and independently  
822 facilitates infection. *Cell Microbiol.* 2016;18(1):97-110. doi:10.1111/cmi.12487
- 823 34. Probert WS, Johnson BJ. Identification of a 47 kDa fibronectin-binding protein expressed  
824 by *Borrelia burgdorferi* isolate B31. *Mol Microbiol.* 1998;30(5):1003-1015.  
825 doi:10.1046/j.1365-2958.1998.01127.x
- 826 35. Probert WS, Kim JH, Höök M, Johnson BJ. Mapping the ligand-binding region of  
827 *Borrelia burgdorferi* fibronectin-binding protein BBK32. *Infect Immun.* 2001;69(6):4129-  
828 4133. doi:10.1128/IAI.69.6.4129-4133.2001
- 829 36. Kim JH, Singvall J, Schwarz-Linek U, Johnson BJ, Potts JR, Höök M. BBK32, a  
830 fibronectin binding MSCRAMM from *Borrelia burgdorferi*, contains a disordered region  
831 that undergoes a conformational change on ligand binding. *J Biol Chem.*  
832 2004;279(40):41706-41714. doi:10.1074/jbc.M401691200
- 833 37. Brissette CA, Bykowski T, Cooley AE, Bowman A, Stevenson B. *Borrelia burgdorferi*  
834 RevA antigen binds host fibronectin. *Infect Immun.* 2009;77(7):2802-2812.  
835 doi:10.1128/IAI.00227-09
- 836 38. Floden AM, Gonzalez T, Gaultney RA, Brissette CA. Evaluation of RevA, a fibronectin-

- 837 binding protein of *Borrelia burgdorferi*, as a potential vaccine candidate for lyme  
838 disease. *Clin Vaccine Immunol.* 2013;20(6):892-899. doi:10.1128/CVI.00758-12
- 839 39. Marconi RT, Sung SY, Hughes CA, Carlyon JA. Molecular and evolutionary analyses of a  
840 variable series of genes in *Borrelia burgdorferi* that are related to *ospE* and *ospF*,  
841 constitute a gene family, and share a common upstream homology box. *J Bacteriol.*  
842 1996;178(19):5615-5626. doi:10.1128/jb.178.19.5615-5626.1996
- 843 40. Stevenson B, Bono JL, Schwan TG, Rosa P. *Borrelia burgdorferi* Erp proteins are  
844 immunogenic in mammals infected by tick bite, and their synthesis is inducible in cultured  
845 bacteria. *Infect Immun.* 1998;66(6):2648-2654. doi:10.1128/IAI.66.6.2648-2654.1998
- 846 41. Brissette CA, Cooley AE, Burns LH, et al. Lyme borreliosis spirochete Erp proteins, their  
847 known host ligands, and potential roles in mammalian infection. *Int J Med Microbiol.*  
848 2008;298 Suppl 1(Suppl 1):257-267. doi:10.1016/j.ijmm.2007.09.004
- 849 42. Akins DR, Caimano MJ, Yang X, Cerna F, Norgard MV, Radolf JD. Molecular and  
850 evolutionary analysis of *Borrelia burgdorferi* 297 circular plasmid-encoded lipoproteins  
851 with OspE- and OspF-like leader peptides. *Infect Immun.* 1999;67(3):1526-1532.  
852 doi:10.1128/IAI.67.3.1526-1532.1999
- 853 43. Grimm D, Tilly K, Byram R, et al. Outer-surface protein C of the Lyme disease  
854 spirochete: a protein induced in ticks for infection of mammals. *Proc Natl Acad Sci U S A.*  
855 2004;101(9):3142-3147. doi:10.1073/pnas.0306845101
- 856 44. Tilly K, Krum JG, Bestor A, et al. *Borrelia burgdorferi* OspC protein required exclusively  
857 in a crucial early stage of mammalian infection. *Infect Immun.* 2006;74(6):3554-3564.  
858 doi:10.1128/IAI.01950-05
- 859 45. Tilly K, Bestor A, Jewett MW, Rosa P. Rapid clearance of Lyme disease spirochetes  
860 lacking OspC from skin. *Infect Immun.* 2007;75(3):1517-1519. doi:10.1128/IAI.01725-06
- 861 46. Hyde JA, Weening EH, Chang M, et al. Bioluminescent imaging of *Borrelia burgdorferi*  
862 *in vivo* demonstrates that the fibronectin-binding protein BBK32 is required for optimal  
863 infectivity. *Mol Microbiol.* 2011;82(1):99-113. doi:10.1111/j.1365-2958.2011.07801.x
- 864 47. Seshu J, Esteve-Gassent MD, Labandeira-Rey M, et al. Inactivation of the fibronectin-  
865 binding adhesin gene *bbk32* significantly attenuates the infectivity potential of *Borrelia*  
866 *burgdorferi*. *Mol Microbiol.* 2006;59(5):1591-1601. doi:10.1111/j.1365-  
867 2958.2005.05042.x
- 868 48. Mühleip JJ, Lin YP, Kraiczy P. Further Insights Into the Interaction of Human and Animal  
869 Complement Regulator Factor H With Viable Lyme Disease Spirochetes. *Front Vet Sci.*  
870 2019;5:346. Published 2019 Jan 31. doi:10.3389/fvets.2018.00346
- 871 49. R. J. Garrigues, A. D. P. Pierce, M. Hammel, J. T. Skare, B. L. Garcia, A structural basis  
872 for inhibition of the complement initiator protease C1r by Lyme disease spirochetes.  
873 *bioRxiv*, 2021.01.21.427683 (2021).
- 874 50. Belperron AA, Bockenstedt LK. Natural antibody affects survival of the spirochete  
875 *Borrelia burgdorferi* within feeding ticks. *Infect Immun.* 2001;69(10):6456-6462.  
876 doi:10.1128/IAI.69.10.6456-6462.2001

- 877 51. Coburn J, Magoun L, Bodary SC, Leong JM. Integrins alpha(v)beta3 and alpha5beta1  
878 mediate attachment of lyme disease spirochetes to human cells. *Infect Immun.*  
879 1998;66(5):1946-1952. doi:10.1128/IAI.66.5.1946-1952.1998
- 880 52. Lin YP, Chen Q, Ritchie JA, et al. Glycosaminoglycan binding by *Borrelia burgdorferi*  
881 adhesin BBK32 specifically and uniquely promotes joint colonization. *Cell Microbiol.*  
882 2015;17(6):860-875. doi:10.1111/cmi.12407
- 883 53. Wu Y, Li Q, Chen XZ. Detecting protein-protein interactions by Far western blotting. *Nat*  
884 *Protoc.* 2007;2(12):3278-3284. doi:10.1038/nprot.2007.459
- 885 54. Nilsson UR, Nilsson B. Simplified assays of hemolytic activity of the classical and  
886 alternative complement pathways. *J Immunol Methods.* 1984;72(1):49-59.  
887 doi:10.1016/0022-1759(84)90432-0
- 888 55. Roos A, Bouwman LH, Munoz J, et al. Functional characterization of the lectin pathway  
889 of complement in human serum. *Mol Immunol.* 2003;39(11):655-668. doi:10.1016/s0161-  
890 5890(02)00254-7
- 891 56. Kardos J, Gál P, Szilágyi L, et al. The role of the individual domains in the structure and  
892 function of the catalytic region of a modular serine protease, C1r. *J Immunol.*  
893 2001;167(9):5202-5208. doi:10.4049/jimmunol.167.9.5202
- 894 57. Brisson D, Drecktrah D, Eggers CH, Samuels DS. Genetics of *Borrelia burgdorferi*. *Annu*  
895 *Rev Genet.* 2012;46:515-536. doi:10.1146/annurev-genet-011112-112140
- 896 58. Setubal JC, Reis M, Matsunaga J, Haake DA. Lipoprotein computational prediction in  
897 spirochaetal genomes. *Microbiology (Reading).* 2006;152(Pt 1):113-121.  
898 doi:10.1099/mic.0.28317-0
- 899 59. Zipfel PF, Skerka C. Complement regulators and inhibitory proteins. *Nat Rev Immunol.*  
900 2009;9(10):729-740. doi:10.1038/nri2620
- 901 60. Plummer JS, Cai C, Hays SJ, et al. Benzenesulfonamide derivatives of 2-substituted 4H-  
902 3,1-benzoxazin-4-ones and benzthiazin-4-ones as inhibitors of complement C1r  
903 protease. *Bioorg Med Chem Lett.* 1999;9(6):815-820. doi:10.1016/s0960-894x(99)00095-  
904 5
- 905 61. Kochi SK, Johnson RC. Role of immunoglobulin G in killing of *Borrelia burgdorferi* by  
906 the classical complement pathway. *Infect Immun.* 1988;56(2):314-321.  
907 doi:10.1128/iai.56.2.314-321.1988
- 908 62. Tufts DM, Hart TM, Chen GF, Kolokotronis SO, Diuk-Wasser MA, Lin YP. Outer  
909 surface protein polymorphisms linked to host-spirochete association in Lyme  
910 borreliae. *Mol Microbiol.* 2019;111(4):868-882. doi:10.1111/mmi.14209
- 911 63. Ripoche J, Erdei A, Gilbert D, Al Salihi A, Sim RB, Fontaine M. Two populations of  
912 complement factor H differ in their ability to bind to cell surfaces. *Biochem J.*  
913 1988;253(2):475-480. doi:10.1042/bj2530475
- 914  
915 64. Ripoche J, Day AJ, Harris TJ, Sim RB. The complete amino acid sequence of human  
916 complement factor H. *Biochem J.* 1988;249(2):593-602. doi:10.1042/bj2490593

- 917  
918 65. Hart T, Yang X, Pal U, Lin YP. Identification of Lyme borreliae proteins promoting  
919 vertebrate host blood-specific spirochete survival in *Ixodes scapularis* nymphs using  
920 artificial feeding chambers. *Ticks Tick Borne Dis.* 2018;9(5):1057-1063.  
921 doi:10.1016/j.ttbdis.2018.03.033  
922
- 923 66. Hart TM, Dupuis AP 2nd, Tufts DM, et al. Host tropism determination by convergent  
924 evolution of immunological evasion in the Lyme disease system. *PLoS Pathog.*  
925 2021;17(7):e1009801. Published 2021 Jul 29. doi:10.1371/journal.ppat.1009801  
926
- 927 67. Dower WJ, Miller JF, Ragsdale CW. High efficiency transformation of *E. coli* by high  
928 voltage electroporation. *Nucleic Acids Res.* 1988;16(13):6127-6145.  
929 doi:10.1093/nar/16.13.6127  
930
- 931 68. Barbour AG. Isolation and cultivation of Lyme disease spirochetes. *Yale J Biol Med.*  
932 1984;57(4):521-525.  
933
- 934 69. Pinne M, Matsunaga J, Haake DA. Leptospiral outer membrane protein microarray, a  
935 novel approach to identification of host ligand-binding proteins. *J Bacteriol.*  
936 2012;194(22):6074-6087. doi:10.1128/JB.01119-12  
937
- 938 70. Wilson MM, Bernstein HD. Surface-Exposed Lipoproteins: An Emerging Secretion  
939 Phenomenon in Gram-Negative Bacteria. *Trends Microbiol.* 2016;24(3):198-208.  
940 doi:10.1016/j.tim.2015.11.006  
941
- 942 71. Dulipati V, Meri S, Panelius J. Complement evasion strategies of *Borrelia burgdorferi*  
943 sensu lato. *FEBS Lett.* 2020;594(16):2645-2656. doi:10.1002/1873-3468.13894  
944
- 945 72. Siegel C, Schreiber J, Haupt K, et al. Deciphering the ligand-binding sites in the *Borrelia*  
946 *burgdorferi* complement regulator-acquiring surface protein 2 required for interactions  
947 with the human immune regulators factor H and factor H-like protein 1. *J Biol Chem.*  
948 2008;283(50):34855-34863. doi:10.1074/jbc.M805844200  
949
- 950 73. Hartmann K, Corvey C, Skerka C, et al. Functional characterization of BbCRASP-2, a  
951 distinct outer membrane protein of *Borrelia burgdorferi* that binds host complement  
952 regulators factor H and FHL-1. *Mol Microbiol.* 2006;61(5):1220-1236.  
953 doi:10.1111/j.1365-2958.2006.05318.x  
954
- 955 74. Radolf JD, Kumar S. The *Treponema pallidum* Outer Membrane. *Curr Top Microbiol*  
956 *Immunol.* 2018;415:1-38. doi:10.1007/82\_2017\_44  
957
- 958 75. Pinne M, Haake DA. LipL32 Is a Subsurface Lipoprotein of *Leptospira interrogans*:  
959 presentation of new data and reevaluation of previous studies. *PLoS One.*  
960 2013;8(1):e51025. doi:10.1371/journal.pone.0051025  
961

- 962 76. Haake DA, Matsunaga J. Leptospiral Immunoglobulin-Like Domain Proteins: Roles in  
963 Virulence and Immunity. *Front Immunol.* 2021;11:579907. Published 2021 Jan 8.  
964 doi:10.3389/fimmu.2020.579907  
965
- 966 77. Cox DL, Luthra A, Dunham-Ems S, et al. Surface immunolabeling and consensus  
967 computational framework to identify candidate rare outer membrane proteins of  
968 *Treponema pallidum*. *Infect Immun.* 2010;78(12):5178-5194. doi:10.1128/IAI.00834-10  
969
- 970 78. Bykowski T, Woodman ME, Cooley AE, et al. Coordinated expression of *Borrelia*  
971 *burgdorferi* complement regulator-acquiring surface proteins during the Lyme disease  
972 spirochete's mammal-tick infection cycle. *Infect Immun.* 2007;75(9):4227-4236.  
973 doi:10.1128/IAI.00604-07  
974
- 975 79. Farady CJ, Craik CS. Mechanisms of macromolecular protease inhibitors. *Chembiochem.*  
976 2010;11(17):2341-2346. doi:10.1002/cbic.201000442  
977
- 978 80. Nagy ZA, Szakács D, Boros E, et al. Ecotin, a microbial inhibitor of serine proteases,  
979 blocks multiple complement dependent and independent microbicidal activities of human  
980 serum. *PLoS Pathog.* 2019;15(12):e1008232. Published 2019 Dec 20.  
981 doi:10.1371/journal.ppat.1008232  
982
- 983 81. Lin YP, Diuk-Wasser MA, Stevenson B, Kraiczy P. Complement Evasion Contributes to  
984 Lyme Borreliae-Host Associations. *Trends Parasitol.* 2020;36(7):634-645.  
985 doi:10.1016/j.pt.2020.04.011  
986
- 987 82. Takacs CN, Scott M, Chang Y, et al. A CRISPR interference platform for selective  
988 downregulation of gene expression in *Borrelia burgdorferi* [published online ahead of  
989 print, 2020 Nov 30]. *Appl Environ Microbiol.* 2020;87(4):e02519-20.  
990 doi:10.1128/AEM.02519-20  
991
- 992 83. Stevenson B, Tilly K, Rosa PA. A family of genes located on four separate 32-kilobase  
993 circular plasmids in *Borrelia burgdorferi* B31. *J Bacteriol.* 1996;178(12):3508-3516.  
994 doi:10.1128/jb.178.12.3508-3516.1996  
995
- 996 84. Metts MS, McDowell JV, Theisen M, Hansen PR, Marconi RT. Analysis of the OspE  
997 determinants involved in binding of factor H and OspE-targeting antibodies elicited  
998 during *Borrelia burgdorferi* infection in mice. *Infect Immun.* 2003;71(6):3587-3596.  
999 doi:10.1128/IAI.71.6.3587-3596.2003  
1000
- 1001 85. Miller JC, El-Hage N, Babb K, Stevenson B. *Borrelia burgdorferi* B31 Erp proteins that  
1002 are dominant immunoblot antigens of animals infected with isolate B31 are recognized  
1003 by only a subset of human lyme disease patient sera. *J Clin Microbiol.* 2000;38(4):1569-  
1004 1574.  
1005



- 1006 86. Babb K, McAlister JD, Miller JC, Stevenson B. Molecular characterization of *Borrelia*  
1007 *burgdorferi* erp promoter/operator elements. *J Bacteriol.* 2004;186(9):2745-2756.  
1008 doi:10.1128/JB.186.9.2745-2756.2004  
1009
- 1010 87. Kraiczy P, Hellwage J, Skerka C, et al. Immune evasion of *Borrelia burgdorferi*:  
1011 mapping of a complement-inhibitor factor H-binding site of BbCRASP-3, a novel  
1012 member of the Erp protein family. *Eur J Immunol.* 2003;33(3):697-707.  
1013 doi:10.1002/eji.200323571  
1014
- 1015 88. Siegel C, Hallström T, Skerka C, et al. Complement factor H-related proteins CFHR2 and  
1016 CFHR5 represent novel ligands for the infection-associated CRASP proteins of *Borrelia*  
1017 *burgdorferi*. *PLoS One.* 2010;5(10):e13519. Published 2010 Oct 20.  
1018 doi:10.1371/journal.pone.0013519  
1019
- 1020 89. Hellwage J, Meri T, Heikkilä T, et al. The complement regulator factor H binds to the  
1021 surface protein OspE of *Borrelia burgdorferi*. *J Biol Chem.* 2001;276(11):8427-8435.  
1022 doi:10.1074/jbc.M007994200  
1023
- 1024 90. Alitalo A, Meri T, Comstedt P, et al. Expression of complement factor H binding  
1025 immunoevasion proteins in *Borrelia garinii* isolated from patients with  
1026 neuroborreliosis. *Eur J Immunol.* 2005;35(10):3043-3053. doi:10.1002/eji.200526354  
1027
- 1028 91. McDowell JV, Wolfgang J, Senty L, Sundy CM, Noto MJ, Marconi RT. Demonstration  
1029 of the involvement of outer surface protein E coiled coil structural domains and higher  
1030 order structural elements in the binding of infection-induced antibody and the  
1031 complement-regulatory protein, factor H. *J Immunol.* 2004;173(12):7471-7480.  
1032 doi:10.4049/jimmunol.173.12.7471  
1033
- 1034

1035 **Figures and Tables**

1036 **Figure 1. Screening the *B. burgdorferi* surface lipoproteome identifies high affinity**  
1037 **interactions between ErpB and ErpQ with human C1. (A)**  $1 \times 10^6$  strain B31-e2 producing  
1038 one of 80 *B. burgdorferi* surface lipoproteins ((6); **Table S1**), as well as a periplasmic lipoprotein  
1039 (BB0460) to serve as a negative control, were applied to microtiter wells coated with human C1  
1040 complex in duplicate. After washing, bound bacteria were quantitated by the change in OD<sub>405nm</sub>  
1041 over time by ELISA using an anti-*Bb* antibody (Abcam, ab20118). The clones are sorted in order  
1042 of binding signal. Error bars indicate SEM. **(A, inset)** Binding of clones producing the indicated  
1043 *B. burgdorferi* Elp protein, along with a positive control (BBK32) or a periplasmic negative  
1044 control (BB0460), to immobilized human C1 complex or BSA was quantitated as described  
1045 above. Error bars indicate SEM. \*\*\*\*,  $p < 0.0001$ ; \*,  $p < 0.05$ ; ns, not significant using Student's *t*  
1046 test to compare mean values. **(B)** Binding of the indicated GST-fusion proteins to wells coated  
1047 with the indicated concentration of human C1 complex was quantitated. The experiment was  
1048 performed six times (GST-ErpB) or nine times (GST-BBK32 and GST-ErpQ) at each  
1049 concentration and error bars indicate SEM. Affinity analysis was performed with Prism  
1050 GraphPad software, using a non-linear regression analysis. **(C)** The ability for GST-ErpB (left)  
1051 GST-ErpQ (right) to bind human C1 complex was evaluated by SPR. A two-fold dilution series  
1052 (0.6 - 150 nM) of C1 complex was injected over GST-ErpB and GST-ErpQ biosensors and  
1053 steady-state affinity analysis was carried out with T200 Evaluation Software. Each SPR  
1054 experiment was performed in triplicate. Equilibrium dissociation constants ( $K_D$ ) calculated from  
1055 ELISA-type and SPR binding assays are shown in **Table 1**.

1056

1057 **Figure 2. ErpB and ErpQ preferentially bind activated forms of C1r and C1s.**

1058 **A)** Extracts from untreated (“-“) or pronase-treated (“+“)  $1 \times 10^7$  strain B31-e2 spirochetes that  
1059 ectopically produce the indicated surface lipoproteins were separated by SDS-PAGE and  
1060 transferred to PVDF membranes. The filters were probed with purified C1 complex (top), C1r  
1061 enzyme (middle) or C1r proenzyme (bottom), and bound probe revealed by anti-C1r antibody,  
1062 followed by HRP-conjugated anti-mouse antibody. Shown is a representative of 3 experiments.

1063 **B)** Filters prepared identically to panel A were probed with purified C1 complex (top), C1s  
1064 enzyme (middle) or C1s proenzyme (bottom), and bound probe revealed by anti-C1s antibody,  
1065 followed by HRP-conjugated anti-mouse antibody. Shown is a representative of 3 experiments.

1066 **C and D)** Biosensors immobilized with GST-ErpB (top) or GST-ErpQ (bottom) were tested by  
1067 SPR for binding to the indicated concentrations of the enzyme or proenzyme forms of C1r (**C**) or  
1068 C1s (**D**) Injection series were each performed in triplicate. For both panels C) and D), steady-  
1069 state affinity fits were determined by T200 Biacore Evaluation software and  $K_D$  values are  
1070 reported in **Table 1**.

1071

1072 **Figure 3. ErpQ is an allosteric inhibitor of complement C1s. A)** Enzymatic cleavage by C1s  
1073 of the small peptide substrate Z-L-Lys-sBzl was assayed with DTNB (Ellman's reagent) in the  
1074 presence of 25  $\mu$ M BBK32-C (non-inhibitory control) or ErpQ at 25°C for 1hr. Experiments  
1075 were performed in triplicate. Absorbance was read at 412 nm and signals were normalized to  
1076 negative control no-substrate wells. **B)** Top: Proteolytic cleavage of C2 by C1s enzyme produces  
1077 ~70kDa C2b and ~35kDa C2a after 1hr at 37°C. Lanes 1-5: C2b accumulation in the presence  
1078 (“+”) or absence (“-“) or 25  $\mu$ M ErpQ, 25  $\mu$  M BBK32-C (non-inhibitory control), 6.25 nM C1s,  
1079 and 685 nM C2. (Note that the amount of C1s loaded is below the level of detection by SDS-  
1080 PAGE). Lanes 6-13: C2b accumulation in the presence of 6.25 nM C1s, 685 nM C2 and a two-  
1081 fold dilution series (from 16 to 0.13  $\mu$ M) of ErpQ. Bottom: The fraction of C2b relative to total  
1082 input C2 in the same lane determined by densitometry analysis data are normalized to C2 (lane  
1083 5) and C1s digested C2 (lane 6). A representative gel is shown. The experiment was performed  
1084 three times. **C)** Top: C4, which consists of 3 polypeptide chains, C4 $\alpha$  (97 kDa), C4 $\beta$  (77 kDa),  
1085 C4 $\gamma$  (33 kDa), is cleaved by C1s enzyme for 1hr at 37 °C to produce C4 $\alpha'$  (88 kDa). Lanes 1-5:  
1086 SDS-PAGE profile in the presence (“+”) or absence (“-“) or 25  $\mu$  M ErpQ, 25  $\mu$  M BBK32-C  
1087 (non-inhibitory control), 6.25 nM C1s, and 616 nM C4. Lanes 6-13: SDS-PAGE profile in the  
1088 presence of 6.25 nM C1s, 616 nM C4 and a two-fold dilution series (from 25 to 0.20  $\mu$ M) of  
1089 ErpQ. Bottom: The fraction of C4 $\alpha'$  relative to input C4 $\beta$  in the same lane and normalized to C1s  
1090 + C4 positive control (lane 6) and negative control C4 (lane 5) was determined by densitometry  
1091 analysis.  
1092

1093 **Figure 4. ErpB and ErpQ inhibit the classical pathway of complement. A-C)** Normal human  
1094 serum (NHS) was incubated with the indicated concentration of purified GST-fusion proteins,  
1095 then added to wells precoated with human IgM. Deposition of **A)** C4b, **B)** C3b, or **C)** C5b-C9  
1096 was determined by the addition of the appropriate primary and secondary antibodies (see  
1097 Materials and Methods) enumerated by absorbance at OD<sub>405nm</sub> or OD<sub>450nm</sub>. Each well was  
1098 normalized to wells with no inhibitor (100%) and no serum (0%). Curves were fit using  
1099 nonlinear regression to determine IC<sub>50</sub> values. **D)** NHS was incubated with the indicated  
1100 concentration of purified GST-fusion proteins and then added to pre-opsonized sheep  
1101 erythrocytes (see Materials and Methods). Erythrocyte lysis was determined by OD<sub>405nm</sub> and  
1102 normalized to lysis by deionized water (100%) and no serum (0%). Error bars indicate SEM.  
1103 Each concentration was tested a minimum of three times.

1104

1105 **Figure 5. Ectopic production of ErpB and ErpQ protect spirochetes from complement-**  
1106 **mediated killing.**  $5 \times 10^7$  spirochetes were treated with a 4  $\mu\text{g/ml}$  of an  *$\alpha$ -B. burgdorferi* strain  
1107 B31 mouse polyclonal antibody or its isotype (IgG) control, followed by exposure to 20%  
1108 untreated or heat-inactivated NHS (or heat-inactivated NHS) containing 10  $\mu\text{g/ml}$  lysozyme for  
1109 four hours. Samples were grown in BSK-II for 72 hours at 33°C and enumerated by dark field  
1110 microscopy. Survival index was calculated by dividing the culture density of each sample in the  
1111 “Bb-specific Ab” or “Isotype control Ab” groups by the average density of the heat-inactivated  
1112 serum group for each strain. Shown is the mean and SEM of triplicate samples. \*\*\*,  $p < 0.001$ ;  
1113 \*\*,  $p < 0.01$ ; ns, not significant using Student’s *t* test to compare mean values.

1114

1115

**Table 1.**

| <b>GST-fusion protein</b> | <b>Complement protein</b> | <b>ELISA <math>K_D</math> (nM)<sup>a</sup></b> | <b>SPR <math>K_D</math> (nM)<sup>b</sup></b> |
|---------------------------|---------------------------|------------------------------------------------|----------------------------------------------|
| GST-ErpB                  | C1                        | $3.4 \pm 0.4$                                  | $5.6 \pm 1.5$                                |
|                           | C1r enzyme                | $41 \pm 4.3$                                   | $100 \pm 27$                                 |
|                           | C1s enzyme                | $6.7 \pm 0.7$                                  | $3.9 \pm 0.48$                               |
|                           | C1r proenzyme             | NB <sup>c</sup>                                | NB                                           |
|                           | C1s proenzyme             | NA                                             | $270 \pm 55$                                 |
| GST-ErpQ                  | C1                        | $3.8 \pm 1.2$                                  | $11 \pm 2.0$                                 |
|                           | C1r enzyme                | $11 \pm 1.9$                                   | $97 \pm 35$                                  |
|                           | C1s enzyme                | $4.7 \pm 1.0$                                  | $4.5 \pm 1.0$                                |
|                           | C1r proenzyme             | NB                                             | NB                                           |
|                           | C1s proenzyme             | NB                                             | $170 \pm 73$                                 |

1116

1117 <sup>a</sup> $K_D$  determined by quantitative ELISA.

1118 <sup>b</sup> $K_D$  determined by SPR.

1119 <sup>c</sup>NB, no detectable binding.

1120

1121 **Table 2. IC<sub>50</sub> for ErpB- and ErpQ-mediated inhibition of the classical pathway of**  
1122 **complement**

1123

| <b>Protein</b> | <b>Hemolysis</b> | <b>C5b-9</b> | <b>C3b</b> | <b>C4b</b> |
|----------------|------------------|--------------|------------|------------|
| GST-BBK32      | 79 ± 5.2         | 100 ± 20     | 29 ± 1.0   | 18 ± 3.3*  |
| GST-ErpQ       | 1500 ± 240       | 1000 ± 210   | 450 ± 26   | 260 ± 62   |
| GST-ErpB       | 1600 ± 190       | 300 ± 43     | 570 ± 29   | 330 ± 130  |

1124

1125 \*IC<sub>50</sub> based on non-GST-tagged BBK32-C construct.

1126

1127



1128 **Fig 1**

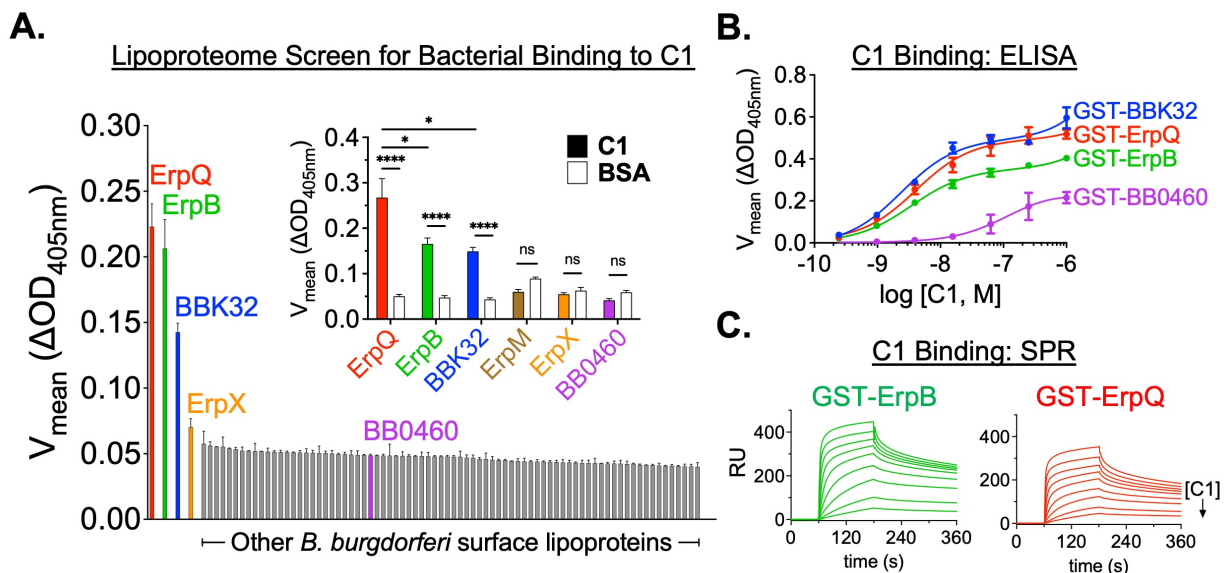

1129

1130

1131

1132 **Fig 2**

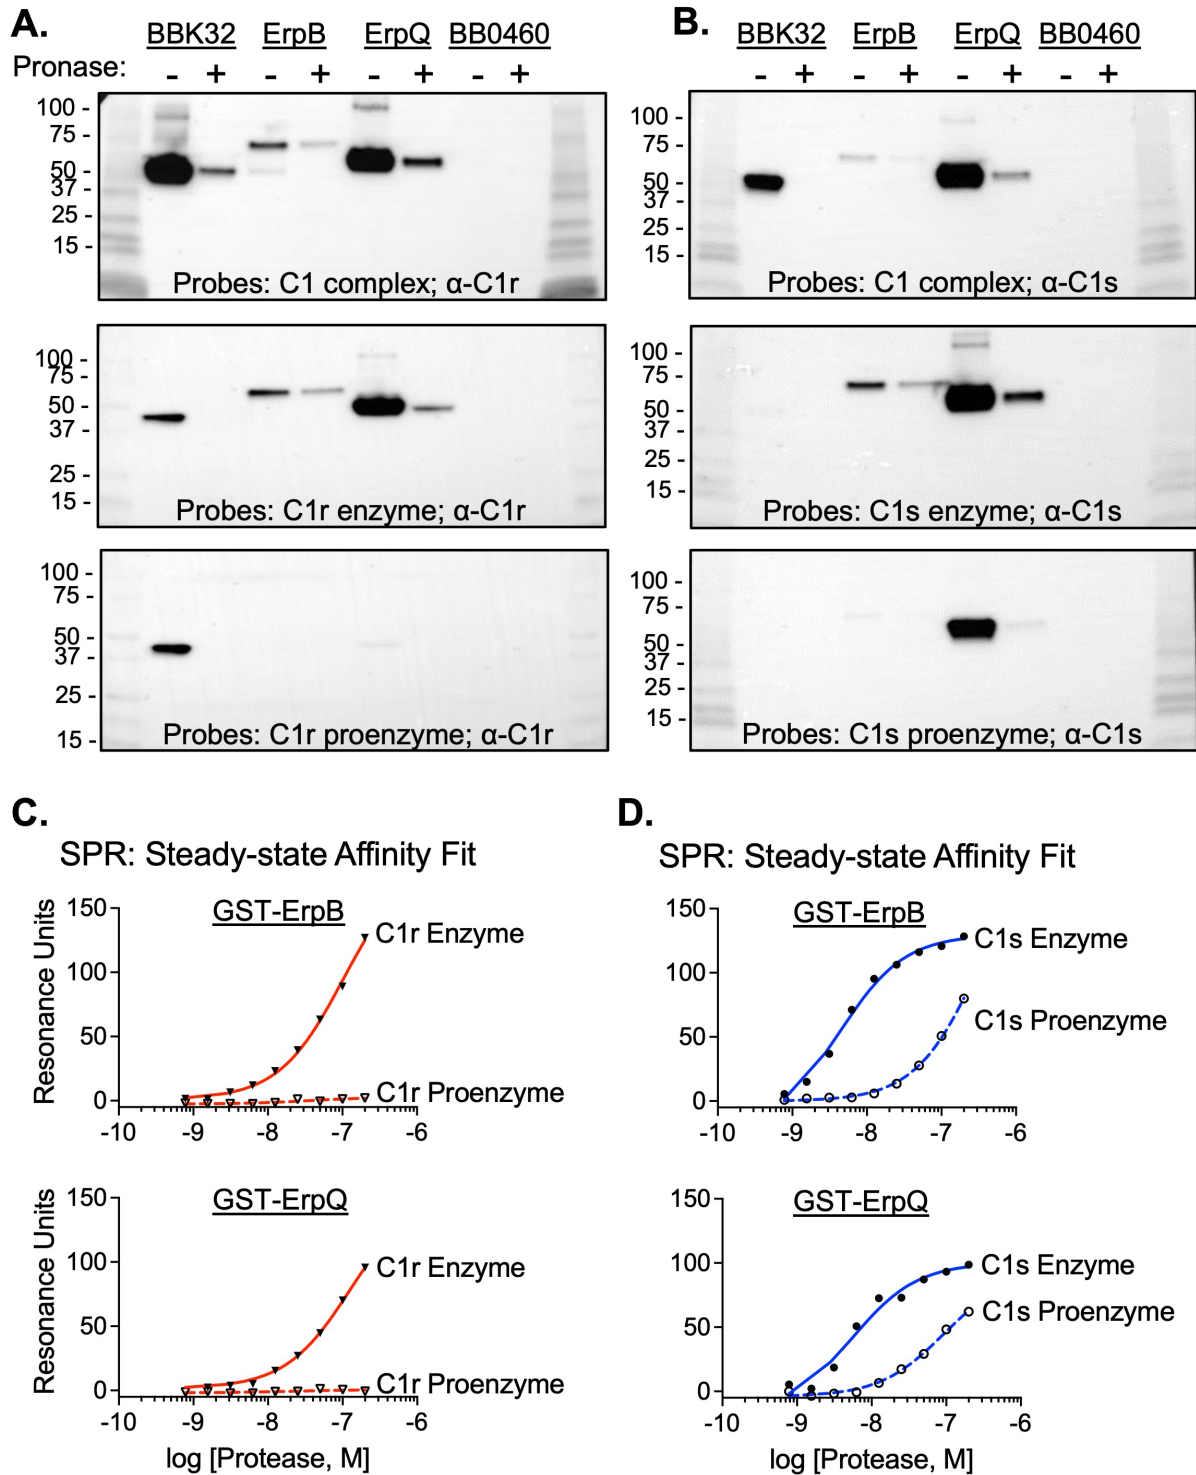

1133

1134

1135

1136

1137 **Fig 3**

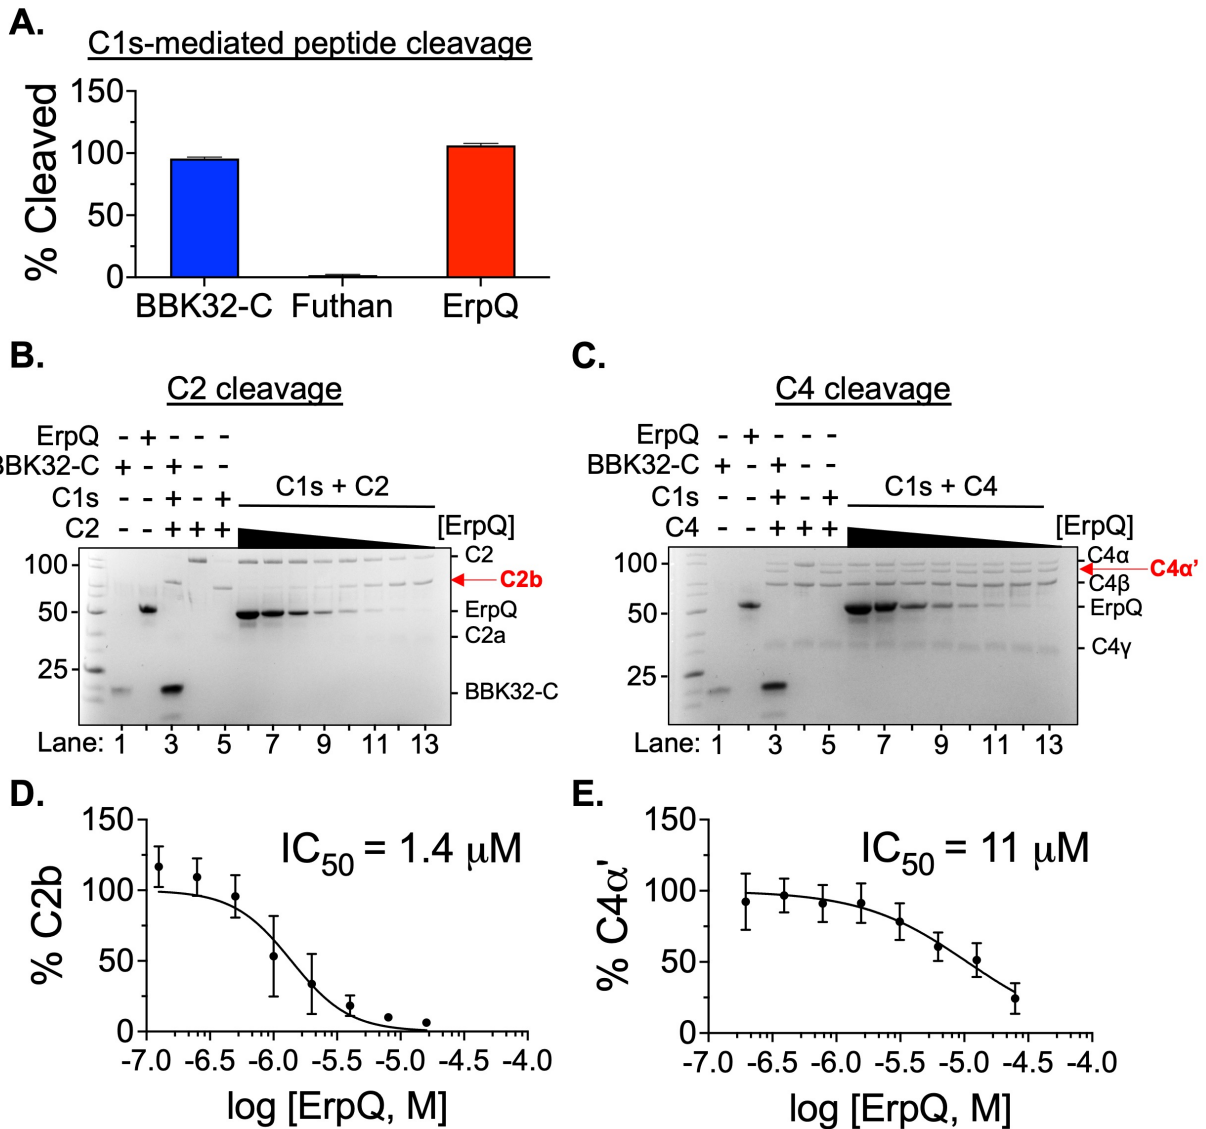

1138

1139

1140

1141 **Fig 4**

1142

1143

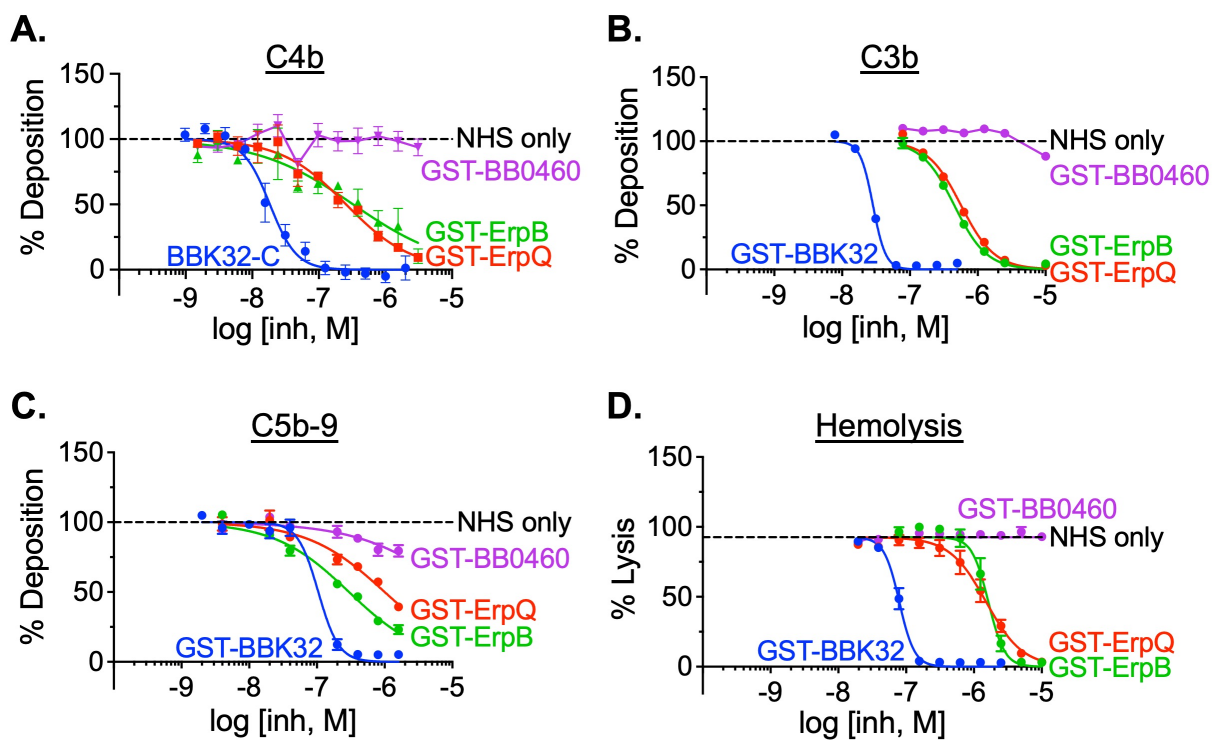

1144

1145

1146 Fig 5

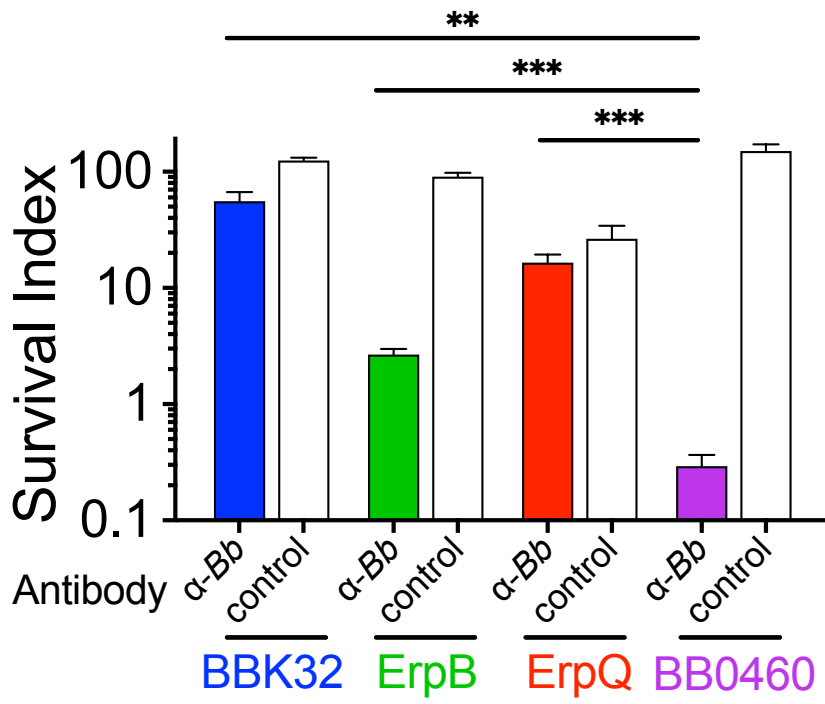

1147
